# Supplementary material for: Botensilimab, an Fc-Enhanced Anti–CTLA-4 Antibody, Is Effective against Tumors Poorly Responsive to Conventional Immunotherapy
Source: PubMed Central journal article supplement — Cancer Discov. 2024 Jul 31;14(12):2407–29. doi: 10.1158/2159-8290.CD-24-0190 (PMC11609826; doi:10.1158/2159-8290.cd-24-0190), 2024-07-31
Supplement: cd-24-0190_supplementary_figure_s1_suppsf1.pdf [file cd-24-0190_supplementary_figure_s1_suppsf1.pdf]

1 **Supplementary Figure S1**

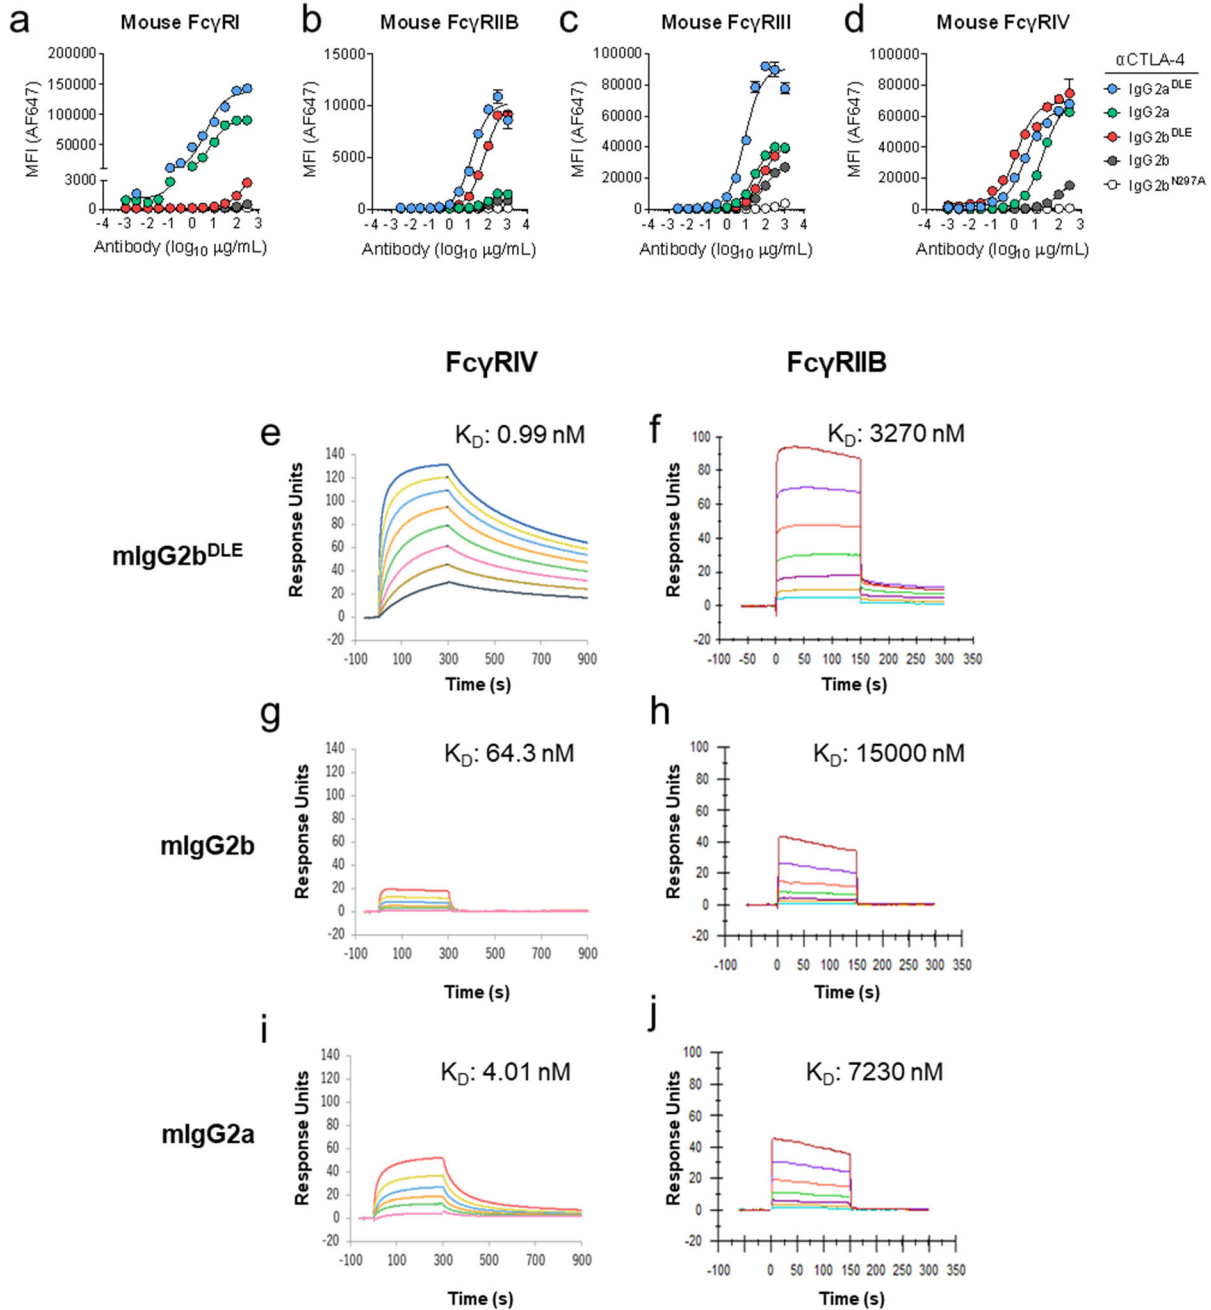

2

3 **Supplementary Figure S1. Binding of mouse  $\alpha$ CTLA-4 antibodies to mouse Fc $\gamma$  receptors.**

4 **(a-d)** Mouse  $\alpha$ CTLA-4 antibodies (clone 9D9) binding to Chinese hamster ovarian cells genetically  
 5 engineered to express mouse **(a)** Fc $\gamma$  receptor (Fc $\gamma$ R) I, **(b)** Fc $\gamma$ RIIB, **(c)** Fc $\gamma$ RIII or **(d)** Fc $\gamma$ RIV.  
 6 Cells were incubated with IgG2a<sup>DLE</sup>, IgG2a, IgG2b<sup>DLE</sup>, IgG2b or IgG2b<sup>N297A</sup> mouse  $\alpha$ CTLA-4

7 antibodies. Binding was analyzed by flow cytometry using an Alexa Fluor 647 fluorochrome  
8 conjugated anti-mouse F(ab')<sub>2</sub> secondary antibody. **(e-j)** Binding kinetics of mouse IgG2b<sup>DLE</sup>, **(e**  
9 **and f)** IgG2b **(g and h)** and IgG2a **(i and j)** αCTLA-4 antibodies to mouse FcγRIV **(e, g and i)** and  
10 FcγRIIB **(f, h and j)** proteins as determined by surface plasmon resonance. FcγR proteins were  
11 captured on a sensor chip and a range of antibody concentrations injected. Representative  
12 sensorgrams are shown and the binding affinity ( $K_D$ ) for each interaction indicated in the  
13 respective panels.
