# Supplementary material for: Botensilimab, an Fc-Enhanced Anti–CTLA-4 Antibody, Is Effective against Tumors Poorly Responsive to Conventional Immunotherapy
Source: PubMed Central journal article supplement — Cancer Discov. 2024 Jul 31;14(12):2407–29. doi: 10.1158/2159-8290.CD-24-0190 (PMC11609826; doi:10.1158/2159-8290.cd-24-0190), 2024-07-31
Supplement: cd-24-0190_supplementary_figure_s2_suppsf2.pdf [file cd-24-0190_supplementary_figure_s2_suppsf2.pdf]

1 **Supplementary Figure S2**

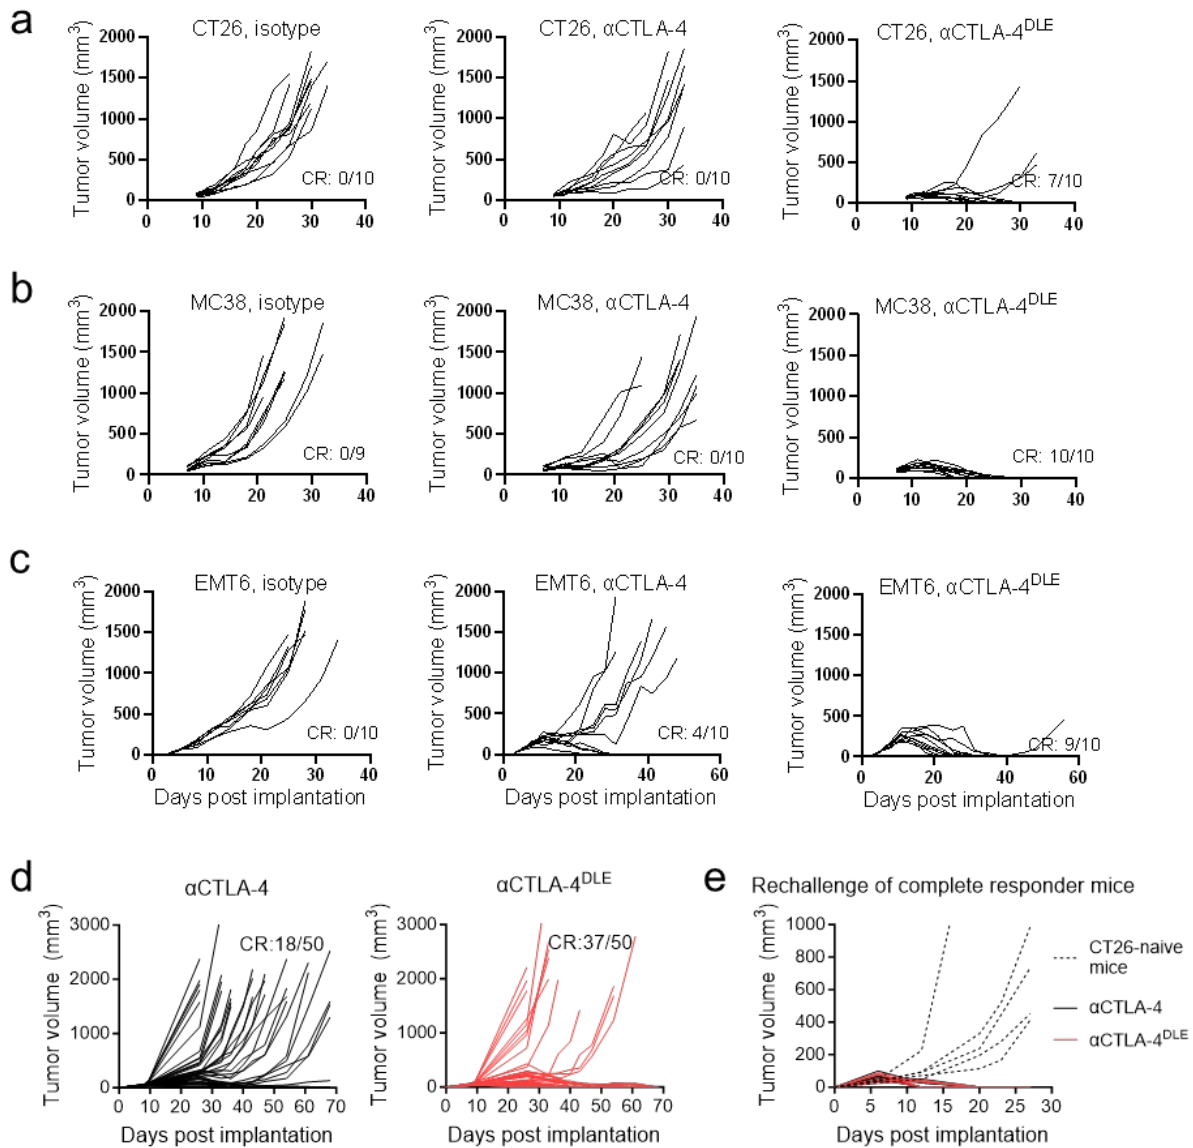

2

3 **Supplementary Figure S2.  $\alpha$ CTLA-4<sup>DLE</sup> promotes superior anti-tumor immunity and T cell**  
 4 **infiltration in the tumor microenvironment versus parental  $\alpha$ CTLA-4 in tumor-bearing**  
 5 **mouse models. (a)** Individual tumor growth of Balb/C mice bearing CT26 subcutaneous tumors  
 6 (~50-75 mm<sup>3</sup>; n=10 mice/group) treated once intraperitoneally with 10  $\mu$ g of indicated antibodies,  
 7 **(b)** C57BL/6 mice bearing MC38 subcutaneous tumors (~120 mm<sup>3</sup>; n=9-10 mice/group) treated  
 8 once intraperitoneally with 100  $\mu$ g of indicated antibodies and **(c)** EMT6 breast orthotopic tumors

9 (~100 mm<sup>3</sup>; n=10/group) treated once weekly for three weeks with 100 µg antibody. **(d)** Individual  
10 tumor growth curves and number of complete responders (no measurable tumor) of Balb/C mice  
11 bearing CT26 subcutaneous tumors (~60 mm<sup>3</sup>; n=50 mice/group) and treated intraperitoneally  
12 with a single dose (100 µg) of antibody, as indicated. **(e)** Tumor growth following rechallenge of  
13 complete responder mice with CT26 cells (1x10<sup>6</sup>) in the contralateral flank compared with tumor  
14 growth in CT26-naive control mice.
