# Supplementary material for: Botensilimab, an Fc-Enhanced Anti–CTLA-4 Antibody, Is Effective against Tumors Poorly Responsive to Conventional Immunotherapy
Source: PubMed Central journal article supplement — Cancer Discov. 2024 Jul 31;14(12):2407–29. doi: 10.1158/2159-8290.CD-24-0190 (PMC11609826; doi:10.1158/2159-8290.cd-24-0190), 2024-07-31
Supplement: cd-24-0190_supplementary_figure_s4_suppsf4.pdf [file cd-24-0190_supplementary_figure_s4_suppsf4.pdf]

1 **Supplementary Figure S4**

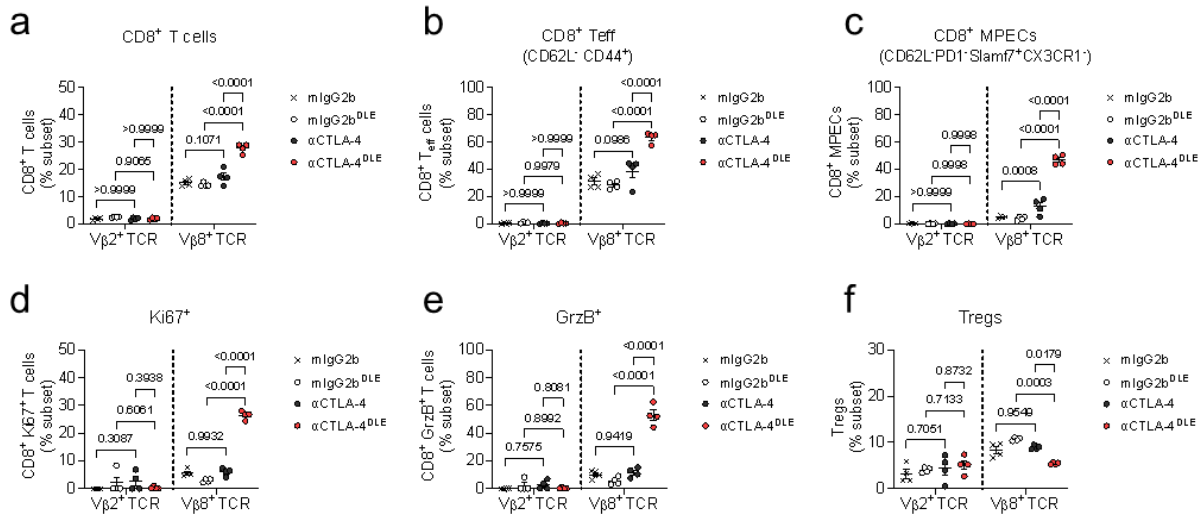

2

3 **Supplementary Figure S4. αCTLA-4<sup>DLE</sup> promotes superior antigen-reactive T cell**  
 4 **responses relative to αCTLA-4 in non-tumor bearing SEB-challenged mice.** C57BL/6 mice  
 5 were injected intraperitoneally with 150 μg of staphylococcal enterotoxin B (SEB) superantigen  
 6 and 100 μg of αCTLA-4<sup>DLE</sup>, αCTLA-4, Fc-enhanced isotype control (clone VRCO1, mIgG2b<sup>DLE</sup>) or  
 7 isotype control (clone VRCO1, mIgG2b) antibodies. Frequency of peripheral SEB-specific (Vβ8)  
 8 and non-specific (Vβ2) **(a)** CD8<sup>+</sup> T cells, **(b)** CD8<sup>+</sup> T effector (CD62L-CD44<sup>+</sup>), **(c)** memory  
 9 precursor effector cells (MPECs) subsets (CD62L-PD-1<sup>-</sup> Slamf7<sup>+</sup> CX3CR1<sup>-</sup>), **(d)** Ki-67<sup>+</sup> and **(e)**  
 10 granzyme B (GrzB<sup>+</sup>) CD8<sup>+</sup> T cells and **(f)** percent regulatory T cells (Tregs) analyzed by flow  
 11 cytometry on day 6. n=4 mice/group. In all panels, indicated p values were calculated using a 2-  
 12 way ANOVA test followed by a Tukey's multiple comparisons test. Data are representative of two  
 13 independent experiments.
