# Supplementary material for: Botensilimab, an Fc-Enhanced Anti–CTLA-4 Antibody, Is Effective against Tumors Poorly Responsive to Conventional Immunotherapy
Source: PubMed Central journal article supplement — Cancer Discov. 2024 Jul 31;14(12):2407–29. doi: 10.1158/2159-8290.CD-24-0190 (PMC11609826; doi:10.1158/2159-8290.cd-24-0190), 2024-07-31
Supplement: cd-24-0190_supplementary_figure_s5_suppsf5.pdf [file cd-24-0190_supplementary_figure_s5_suppsf5.pdf]

1 **Supplementary Figure S5**

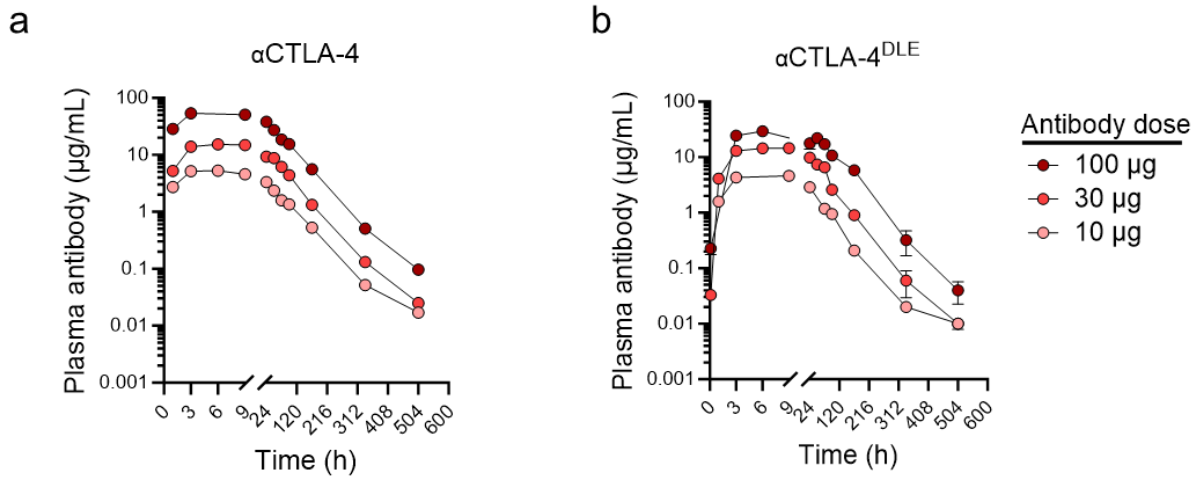

2 **C**

| Antibody (Clone 9D9)            | αCTLA-4 (mIgG2b) |        |        | αCTLA-4 <sup>DLE</sup> (mIgG2b.DLE) |       |        |
|---------------------------------|------------------|--------|--------|-------------------------------------|-------|--------|
| Dose (µg)                       | 10               | 30     | 100    | 10                                  | 30    | 100    |
| C <sub>max</sub> (µg/mL)        | 5.3              | 15.4   | 53.9   | 4.6                                 | 14.4  | 35.7   |
| T <sub>max</sub> (h)            | 6                | 6      | 3      | 9                                   | 6     | 9      |
| T <sub>1/2</sub> (h)            | 60.0             | 52.9   | 54.1   | 49.9                                | 44.8  | 48.4   |
| AUC <sub>0-last</sub> (h*µg/mL) | 372.3            | 1157.4 | 4142.1 | 261.9                               | 925.0 | 2751.9 |
| V <sub>z</sub> (mL)             | 2.3              | 2.0    | 1.9    | 2.7                                 | 2.1   | 2.5    |
| Cl (mL/h)                       | 0.027            | 0.026  | 0.024  | 0.038                               | 0.032 | 0.036  |
| Lambda z (1/h)                  | 0.012            | 0.013  | 0.013  | 0.014                               | 0.015 | 0.014  |

3

4 **Supplementary Figure S5. Pharmacokinetics of mouse αCTLA-4<sup>DLE</sup>.** Concentration – time

5 curves from plasma collected at indicated time points from Balb/c mice administered 10, 30 or

6 100 µg of **(a)** αCTLA-4 (clone 9D9, αCTLA-4) or **(b)** Fc-enhanced αCTLA-4 (clone 9D9, αCTLA-

7 4<sup>DLE</sup>) antibodies on study day 0. Plasma drug concentrations were quantified using a qualified

8 ligand capture ELISA assay. **(c)** Pharmacokinetic parameter from a non-compartmental analysis

9 (NCA) analysis performed on concentration - time data from **(a)** and **(b)**. Abbreviations. C<sub>max</sub>,

10 concentration maximum; T<sub>max</sub>, time maximum; T<sub>1/2</sub>, half-life; AUC, area under the curve; V<sub>z</sub>,

volume of distribution; Cl, clearance.
