# Supplementary material for: Botensilimab, an Fc-Enhanced Anti–CTLA-4 Antibody, Is Effective against Tumors Poorly Responsive to Conventional Immunotherapy
Source: PubMed Central journal article supplement — Cancer Discov. 2024 Jul 31;14(12):2407–29. doi: 10.1158/2159-8290.CD-24-0190 (PMC11609826; doi:10.1158/2159-8290.cd-24-0190), 2024-07-31
Supplement: cd-24-0190_supplementary_figure_s6_suppsf6.pdf [file cd-24-0190_supplementary_figure_s6_suppsf6.pdf]

1 **Supplementary Figure S6**

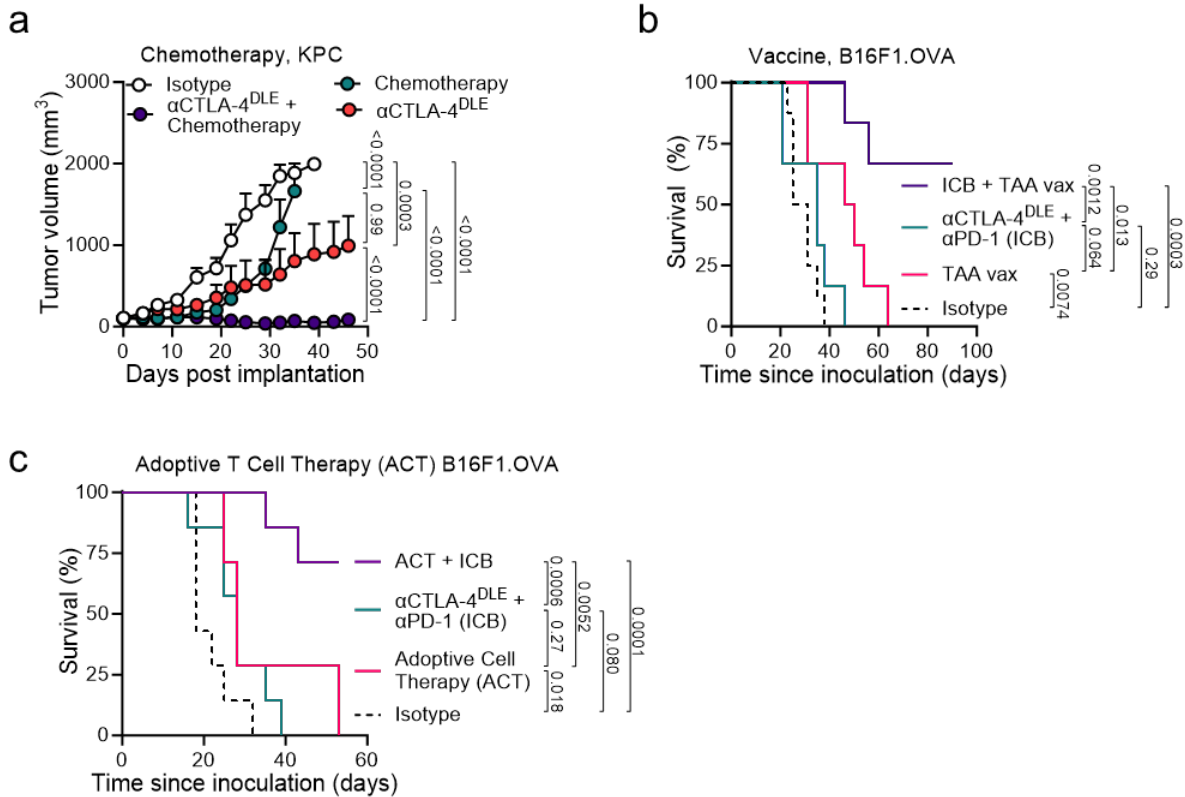

2

3 **Supplementary Figure S6. αCTLA-4<sup>DLE</sup> promotes broad combination activity in diverse**

4 **tumor-bearing mouse models. (a)** Tumor growth of C57BL/6 mice bearing subcutaneous KPC

5 tumors (n=10-15 mice/group) treated with αCTLA-4<sup>DLE</sup> or isotype alone or in combination with

6 gemcitabine, cisplatin, and nab-paclitaxel. **(b)** C57BL/6 mice bearing B16F1.OVA tumors treated

7 with αCTLA-4<sup>DLE</sup> and αPD-1 (ICB), and/or HSC70-OVA-TRP2 vaccine plus QS21 and CpG (TAA

8 vax). **(c)** C57BL/6 mice bearing subcutaneous B16F1.OVA tumors treated with OVA-specific CD8

9 T cells (ACT), ICB, or isotype antibody. Data analyzed by mixed-effects models with matched

10 data followed by Tukey's multiple comparisons test **(a)** or pairwise log-rank test **(b, c)**.
