# Supplementary material for: Botensilimab, an Fc-Enhanced Anti–CTLA-4 Antibody, Is Effective against Tumors Poorly Responsive to Conventional Immunotherapy
Source: PubMed Central journal article supplement — Cancer Discov. 2024 Jul 31;14(12):2407–29. doi: 10.1158/2159-8290.CD-24-0190 (PMC11609826; doi:10.1158/2159-8290.cd-24-0190), 2024-07-31
Supplement: cd-24-0190_supplementary_figure_s7_suppsf7.pdf [file cd-24-0190_supplementary_figure_s7_suppsf7.pdf]

1 **Supplementary Figure S7**

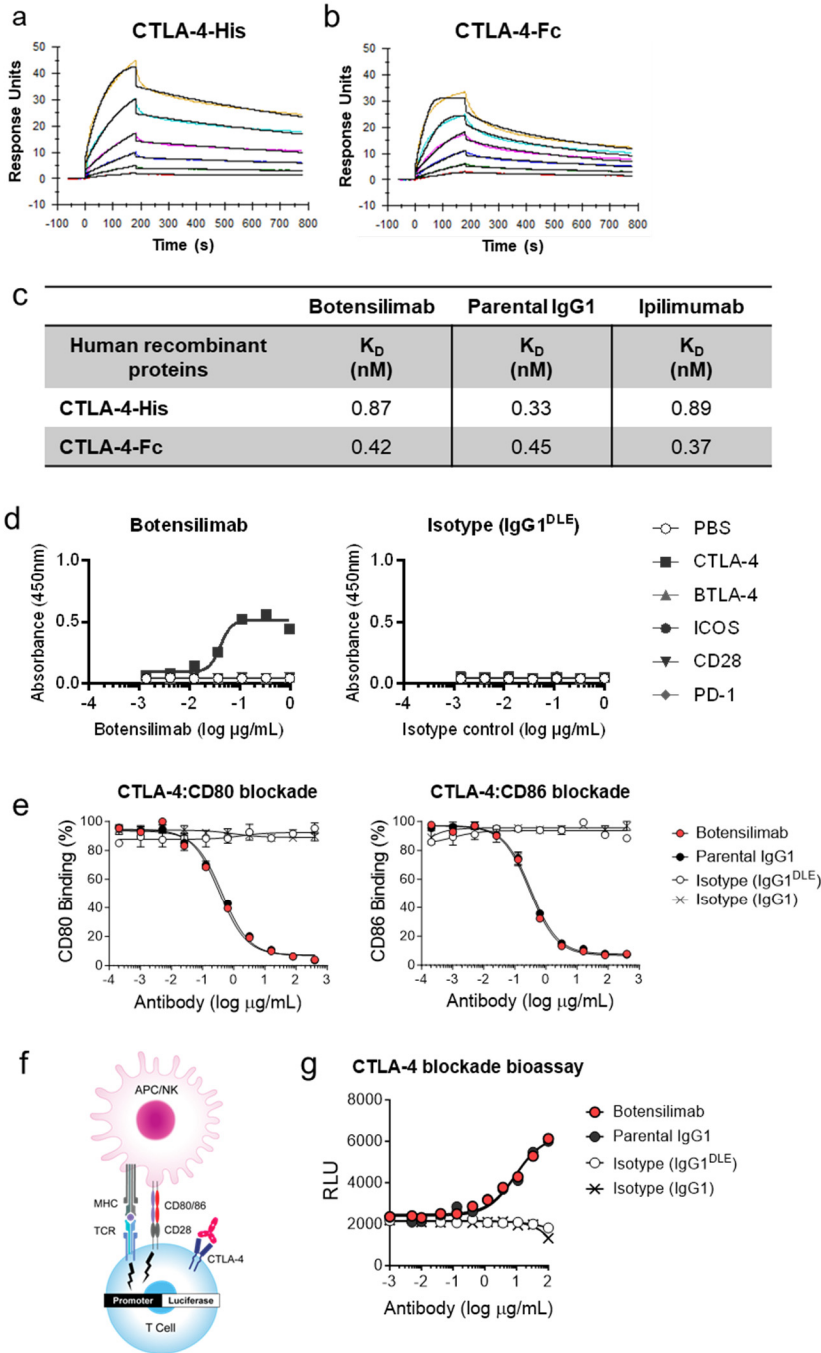

2  
 3 **Supplementary Figure S7. Botensilimab binds selectively to CTLA-4 and completely blocks**  
 4 **CTLA-4 interactions with CD80 and CD86 to enhance T cell activation.** Binding affinity of  
 5 botensilimab to human CTLA-4 determined by surface plasmon resonance. Representative  
 6 sensorgram showing binding of botensilimab to recombinant human **(a)** CTLA-4-His and **(b)**

7 CTLA-4-Fc. Concentrations: 30 (yellow), 15 (cyan), 7.5 (pink), 3.75 (blue), 1.875 (green) and 0.93  
8 (red) nM. Fitted binding curves in black. **(c)** Binding association ( $K_a$ ), binding dissociation ( $K_d$ )  
9 and affinity measurements ( $K_D$ ) for botensilimab, parental IgG1 and ipilimumab to human CTLA-  
10 4-His and CTLA-4-Fc by surface plasmon resonance. Data are average of two individual  
11 experiments. **(d)** Botensilimab binds selectively to CTLA-4, but not other CD28 family members.  
12 Binding of botensilimab or an Fc-enhanced isotype control antibody (IgG1<sup>DLE</sup>) to recombinant  
13 CD28 family members immobilized to an assay plate measured using an enzyme-linked  
14 immunosorbent assay. Binding was detected using a horseradish peroxidase labelled secondary  
15 antibody and absorbance measured at 450 nm. **(e)** Ability of botensilimab to block cell-expressed  
16 CTLA-4 binding to CD80-Fc and CD86-Fc. CTLA-4 expressing Chinese hamster ovarian cells  
17 were incubated with botensilimab, parental IgG1 (an IgG1 variant of botensilimab), IgG1<sup>DLE</sup>, or  
18 IgG1 isotype controls, followed by incubation with 0.2  $\mu$ g/mL fluorescent-labelled recombinant  
19 CD80-Fc or CD86-Fc. The mean fluorescence intensity (MFI) of CD80- or CD86-bound cells was  
20 assessed by flow cytometry. **(f)** Illustration of the CTLA-4 ligand blocking bioassay (Promega)  
21 showing target cells (Jurkat cells expressing CTLA-4 and an IL2-dependent luciferase reporter)  
22 co-cultured with antigen-presenting cells (APC) engineered to express CD80, CD86 and an  
23 antigen-independent T cell activator.  $\alpha$ CTLA-4 blocks CTLA-4 interactions with CD80 and CD86  
24 to re-establish T cell receptor (TCR) and CD28 pathway activated luminescence. **(g)** Dose  
25 response of luciferase activity induced by botensilimab, parental IgG1, IgG1<sup>DLE</sup>, or IgG1 isotype  
26 controls. Luciferase activity measured as relative luminescence units (RLU).
