# Supplementary material for: Botensilimab, an Fc-Enhanced Anti–CTLA-4 Antibody, Is Effective against Tumors Poorly Responsive to Conventional Immunotherapy
Source: PubMed Central journal article supplement — Cancer Discov. 2024 Jul 31;14(12):2407–29. doi: 10.1158/2159-8290.CD-24-0190 (PMC11609826; doi:10.1158/2159-8290.cd-24-0190), 2024-07-31
Supplement: cd-24-0190_supplementary_figure_s8_suppsf8.pdf [file cd-24-0190_supplementary_figure_s8_suppsf8.pdf]

1 Supplementary Figure S8

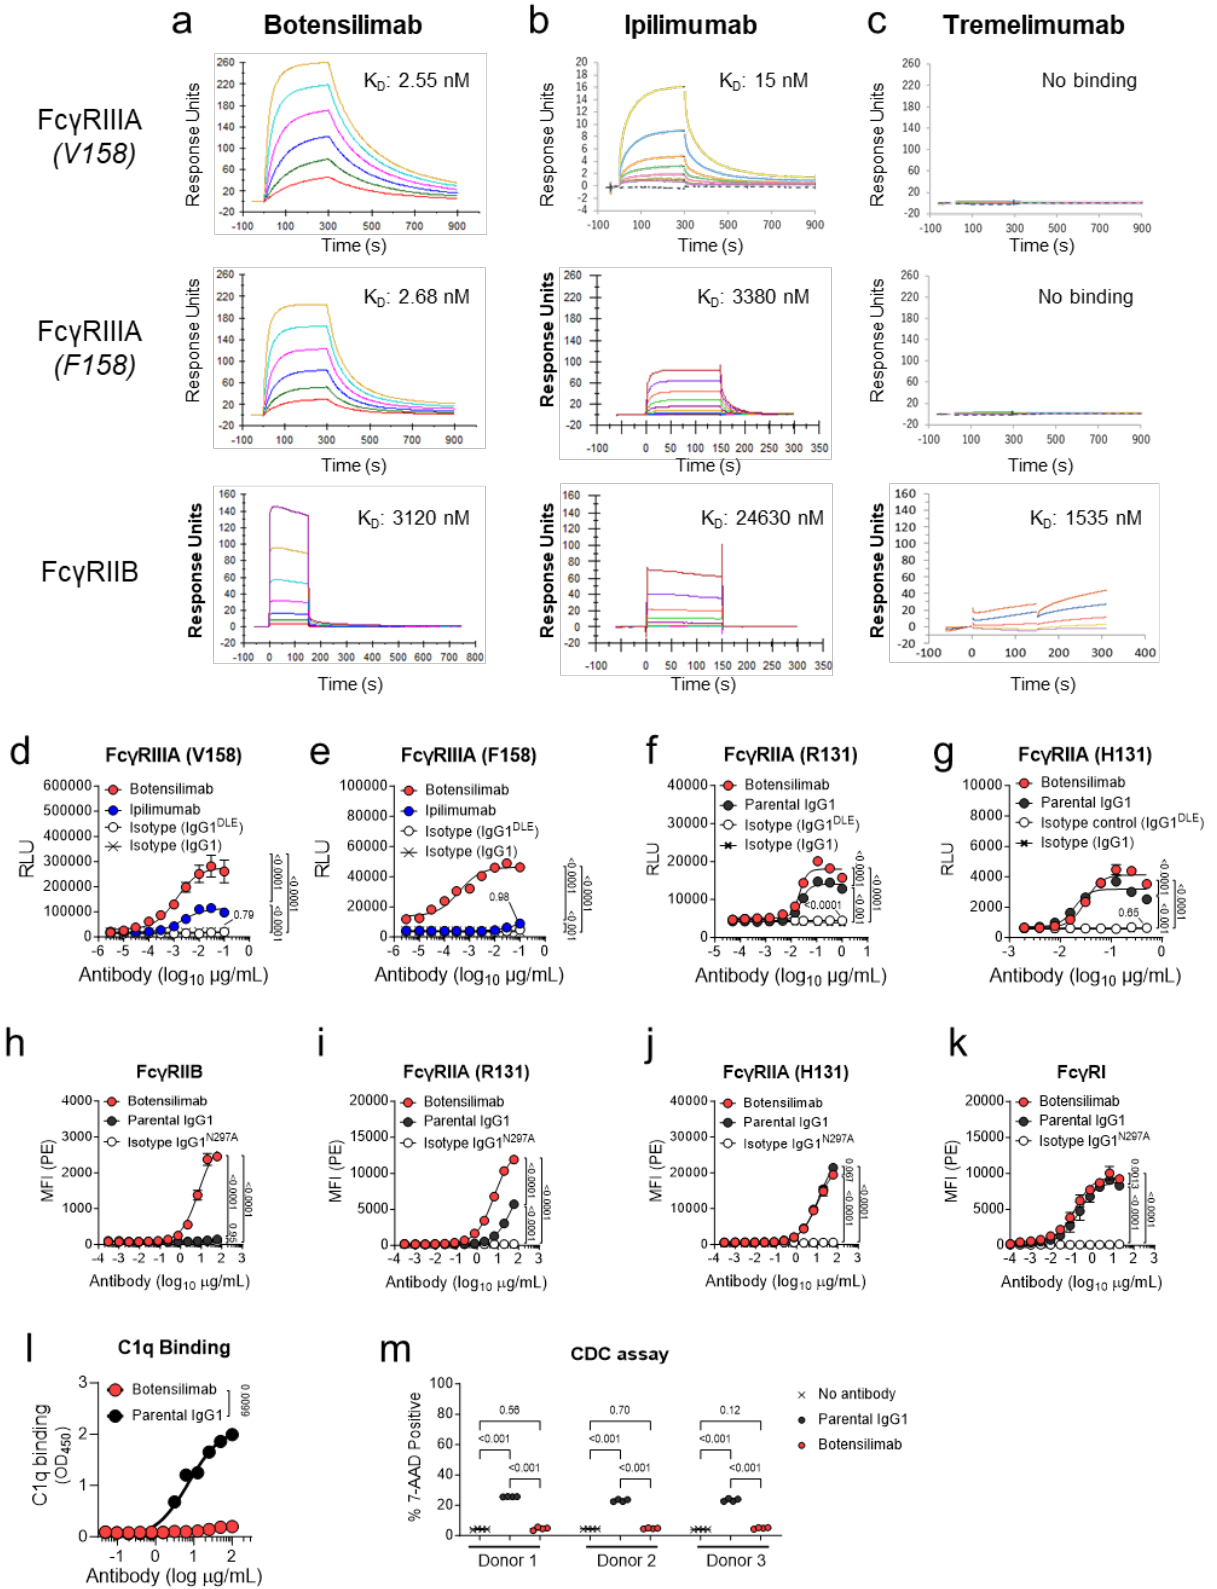

3 **Supplementary Figure S8. Botensilimab demonstrates enhanced binding to Fcγ receptors**  
4 **and superior induction of FcγRIIIA signaling as compared to ipilimumab but does not**  
5 **mediate complement-dependent cytotoxicity (CDC).** Binding kinetics of **(a)** botensilimab, **(b)**  
6 ipilimumab or **(c)** tremelimumab to human FcγRIIIA V158 (valine at position 158; top row),  
7 FcγRIIIA F158 (phenylalanine at position 158; middle row) and FcγRIIB (bottom row) proteins as  
8 determined by surface plasmon resonance. FcγR proteins were captured on a sensor chip and a  
9 range of antibody concentrations were injected. Representative sensorgrams are shown, and the  
10 binding affinity ( $K_D$ ) for each interaction is indicated in the respective panels. Activation of Jurkat  
11 cells genetically engineered to express **(d)** FcγRIIIA V158, **(e)** FcγRIIIA F158, **(f)** FcγRIIA R131  
12 (arginine at position 131), or **(g)** FcγRIIA H131 (histidine at position 131) upstream of a NFAT-  
13 dependent luciferase reporter. Cells were co-cultured with CTLA-4-expressing cells and treated  
14 with a dose range of the indicated antibodies. Receptor activation was assessed by luciferase  
15 expression, shown as relative light units (RLU). Results representative of two independent  
16 experiments. Botensilimab binding to Chinese hamster ovarian cells genetically engineered to  
17 express **(h)** Fcγ receptor (FcγR) IIB, **(i)** FcγRIIA R131 (arginine at position 131), **(j)** FcγRIIA H131  
18 (histidine at position 131), or **(k)** FcγRI. Cells were incubated with botensilimab, parental IgG1, or  
19 isotype IgG1<sup>N297A</sup> aglycosylated control antibody (negative control) and binding analyzed by flow  
20 cytometry using a fluorochrome conjugated anti-human F(ab')<sub>2</sub> secondary antibody. **(l)** Binding  
21 to C1q was evaluated by enzyme-linked immunosorbent assay. A dose titration of plate bound  
22 botensilimab or parental IgG1 was exposed to C1q. To detect C1q binding, antibodies were  
23 incubated with a biotinylated anti-C1q followed by streptavidin-horse radish peroxidase and  
24 absorbance measured at 450 nm. **(m)** CTLA-4<sup>+</sup> Jurkat cells were incubated with 20% normal  
25 human serum from three healthy donors and treated with 10 μg/mL of the indicated antibodies.  
26 Cells were incubated for 4 hours followed by staining with a viability dye. Percent cell death was  
27 determined by flow cytometric analysis. All samples were tested in quadruplicate. Data were

- 28 analyzed using a two-way ANOVA followed by a Tukey's multiple comparisons test (**d-k, m**) or  
29 unpaired t-test (**l**).
