# Supplementary material for: Botensilimab, an Fc-Enhanced Anti–CTLA-4 Antibody, Is Effective against Tumors Poorly Responsive to Conventional Immunotherapy
Source: PubMed Central journal article supplement — Cancer Discov. 2024 Jul 31;14(12):2407–29. doi: 10.1158/2159-8290.CD-24-0190 (PMC11609826; doi:10.1158/2159-8290.cd-24-0190), 2024-07-31
Supplement: cd-24-0190_supplementary_figure_s9_suppsf9.pdf [file cd-24-0190_supplementary_figure_s9_suppsf9.pdf]

1 Supplementary Figure S9

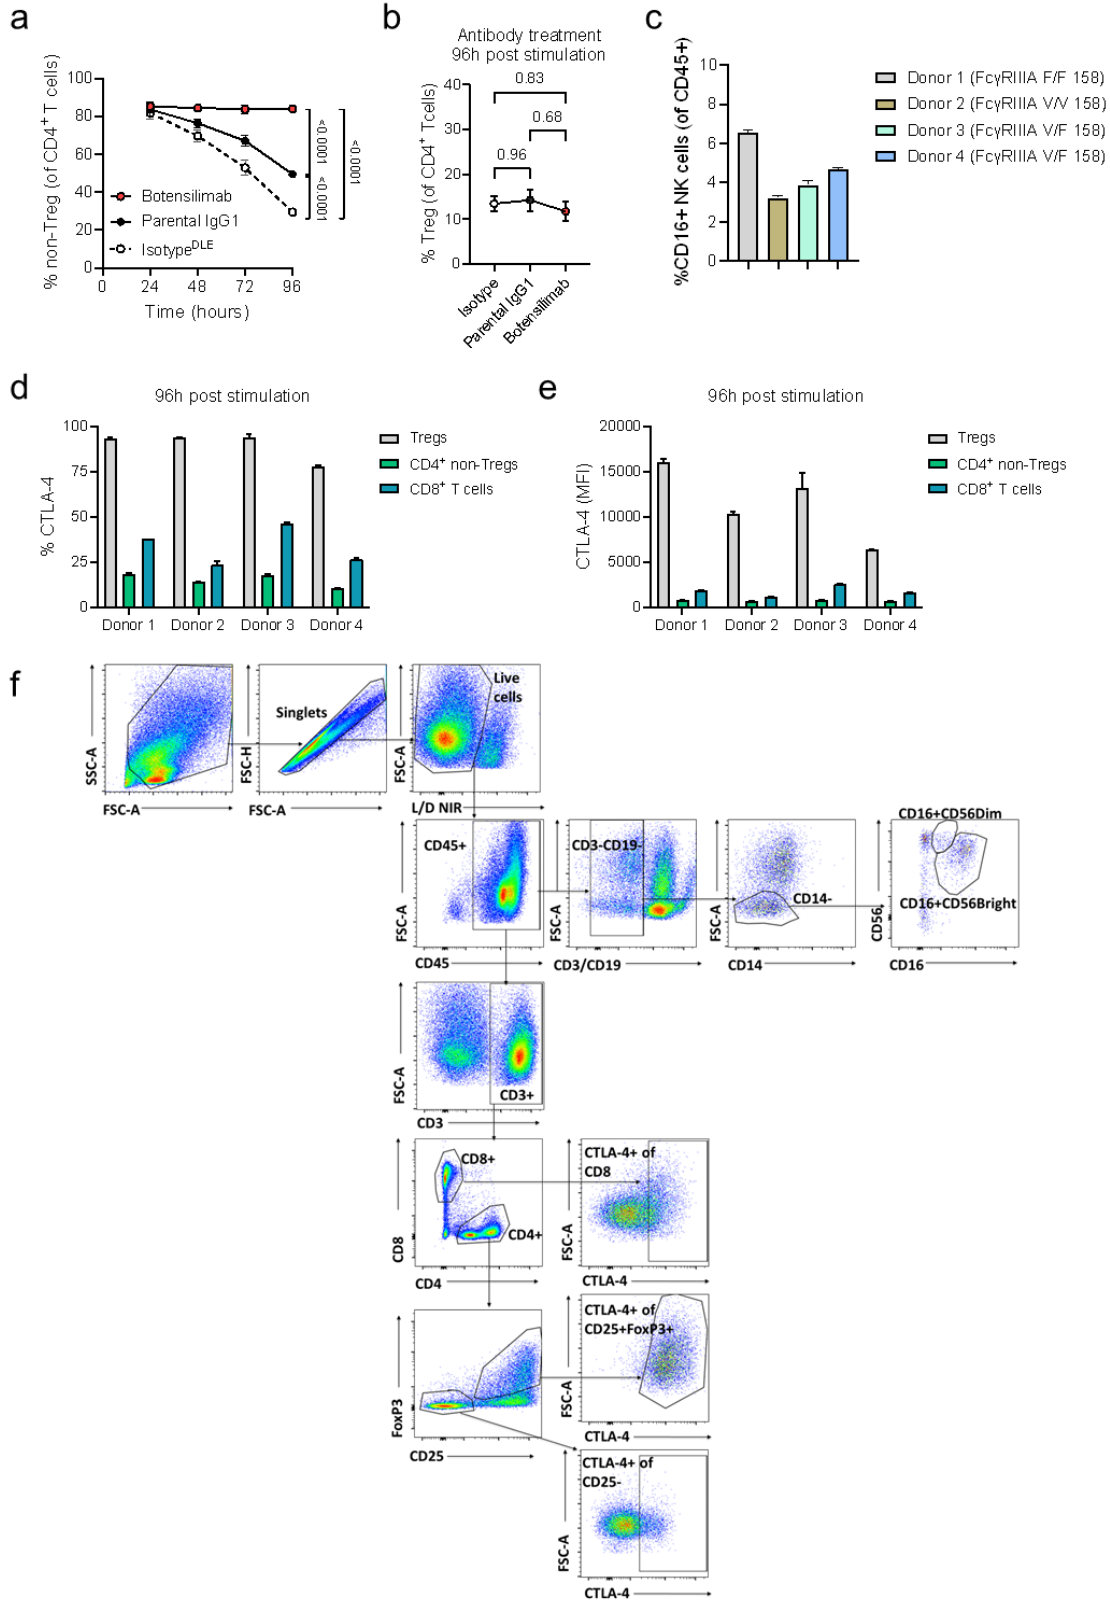

3 **Supplementary Figure S9. Botensilimab does not decrease CD4+ non-regulatory T cells**  
4 **(non-Tregs) from stimulated human PBMC cultures. (a)** CD4<sup>+</sup> non-Treg frequencies from  
5 staphylococcal enterotoxin A (SEA)-stimulated healthy donor PBMCs treated with 5 µg/ml of  
6 botensilimab, parental IgG1, or IgG1<sup>DLE</sup> by flow cytometry (n=4 donors). **(b)** Percentage of Treg  
7 cells among CD4<sup>+</sup> T cells from SEA-stimulated PBMCs. Cultures were treated with botensilimab,  
8 parental IgG1, or isotype antibodies 96h post-SEA peptide stimulation of PBMCs (n=4 donors).  
9 **(c)** Percentage of FcγRIIIA (CD16<sup>+</sup>)-expressing NK cells, **(d)** percentage of CTLA-4+, and **(e)**  
10 mean fluorescent intensity (MFI) of CTLA-4 on Tregs, CD4<sup>+</sup> non-Tregs and CD8<sup>+</sup> T cells at 96h  
11 post-SEA peptide stimulation. **(f)** Representative flow cytometry gating strategy for CD4<sup>+</sup> and  
12 CD8<sup>+</sup> T cell subsets, and CD16<sup>+</sup> NK cells profiled from staphylococcal enterotoxin A (SEA)  
13 superantigen-stimulated PBMC cultures are shown. CD8<sup>+</sup> T cells (CD3<sup>+</sup>, CD4<sup>-</sup> CD8<sup>+</sup>), CD4<sup>+</sup> non-  
14 Tregs (CD3<sup>+</sup>, CD4<sup>+</sup> CD8<sup>-</sup>, CD25<sup>-</sup>, FoXP3<sup>-</sup>), Tregs (CD3<sup>+</sup>, CD4<sup>+</sup> CD8<sup>-</sup>, CD25<sup>+</sup>, FoXP3<sup>+</sup>) were  
15 defined in each T cell subpopulation. NK cells were defined as CD3<sup>-</sup>, CD19<sup>-</sup>, CD14<sup>-</sup>, CD56<sup>+</sup>. Data  
16 are represented as mean ± s.e.m **(a-e)**. Data were analyzed using a **(a)** two-way ANOVA or **(b)**  
17 one-way ANOVA followed by a Tukey's multiple comparisons test.
