# Supplementary material for: Botensilimab, an Fc-Enhanced Anti–CTLA-4 Antibody, Is Effective against Tumors Poorly Responsive to Conventional Immunotherapy
Source: PubMed Central journal article supplement — Cancer Discov. 2024 Jul 31;14(12):2407–29. doi: 10.1158/2159-8290.CD-24-0190 (PMC11609826; doi:10.1158/2159-8290.cd-24-0190), 2024-07-31
Supplement: cd-24-0190_supplementary_figure_s10_suppsf10.pdf [file cd-24-0190_supplementary_figure_s10_suppsf10.pdf]

1 Supplementary Figure S10

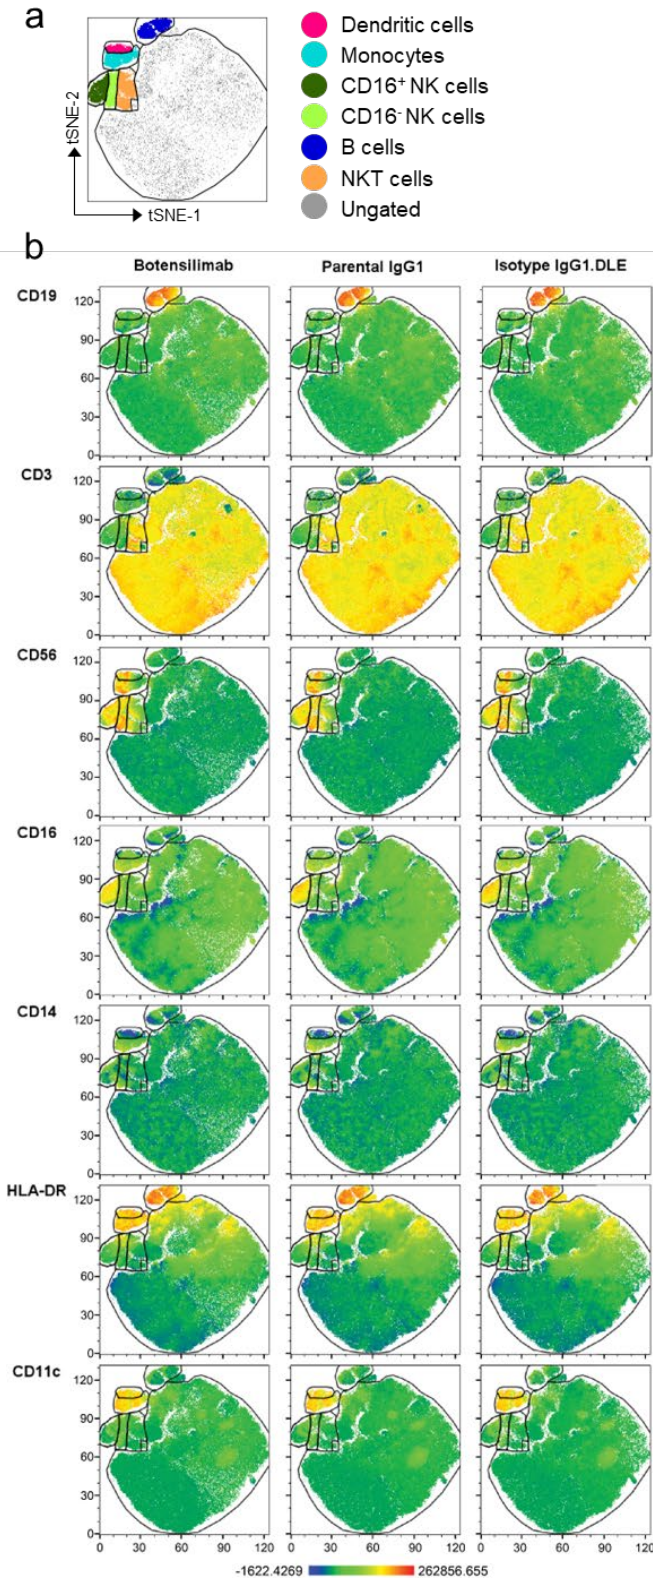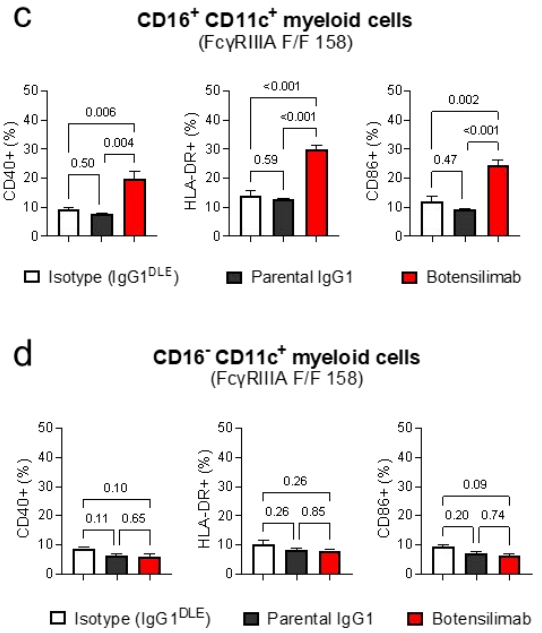

3 **Supplementary Figure S10. Botensilimab increases the frequency of CD11c<sup>+</sup> HLA-DR<sup>+</sup>**  
4 **myeloid cells but not of activated CD16<sup>-</sup> myeloid cells. (a)** Representative global *t*-distributed  
5 stochastic neighbour embedding (tSNE) map of total live immune cells (CD45<sup>+</sup>) from five  
6 staphylococcal enterotoxin A (SEA)-stimulated FcγRIIIA V/F 158 heterozygote healthy donors  
7 showing the representative immune cell populations. **(b)** tSNE maps showing the expression of  
8 individual phenotypic markers measured by flow cytometry in concatenated total live immune cells  
9 analyzed from five SEA-stimulated FcγRIIIA V/F 158 heterozygote healthy donors treated with 10  
10 μg/ml of botensilimab, parental IgG1 or isotype control (IgG1<sup>DLE</sup>) antibodies for 4 days. Data from  
11 indicated treatment are shown separately as overlays. **(c)** Activated CD16<sup>+</sup>CD11c<sup>+</sup> **(d)** and CD16<sup>-</sup>  
12 CD11c<sup>+</sup> myeloid cell frequency determined by CD40, HLA-DR and CD86 expression by flow  
13 cytometry. Representative data shown from a FcγRIIIA F/F 158 homozygous donor. Data are  
14 represented as mean ± s.e.m. **(c, d)**. Data were analyzed with a one-way ANOVA followed by a  
15 Tukey's multiple comparisons test **(c,d)**.
