# Supplementary material for: Botensilimab, an Fc-Enhanced Anti–CTLA-4 Antibody, Is Effective against Tumors Poorly Responsive to Conventional Immunotherapy
Source: PubMed Central journal article supplement — Cancer Discov. 2024 Jul 31;14(12):2407–29. doi: 10.1158/2159-8290.CD-24-0190 (PMC11609826; doi:10.1158/2159-8290.cd-24-0190), 2024-07-31
Supplement: cd-24-0190_supplementary_figure_s11_suppsf11.pdf [file cd-24-0190_supplementary_figure_s11_suppsf11.pdf]

1 **Supplementary Figure S11**

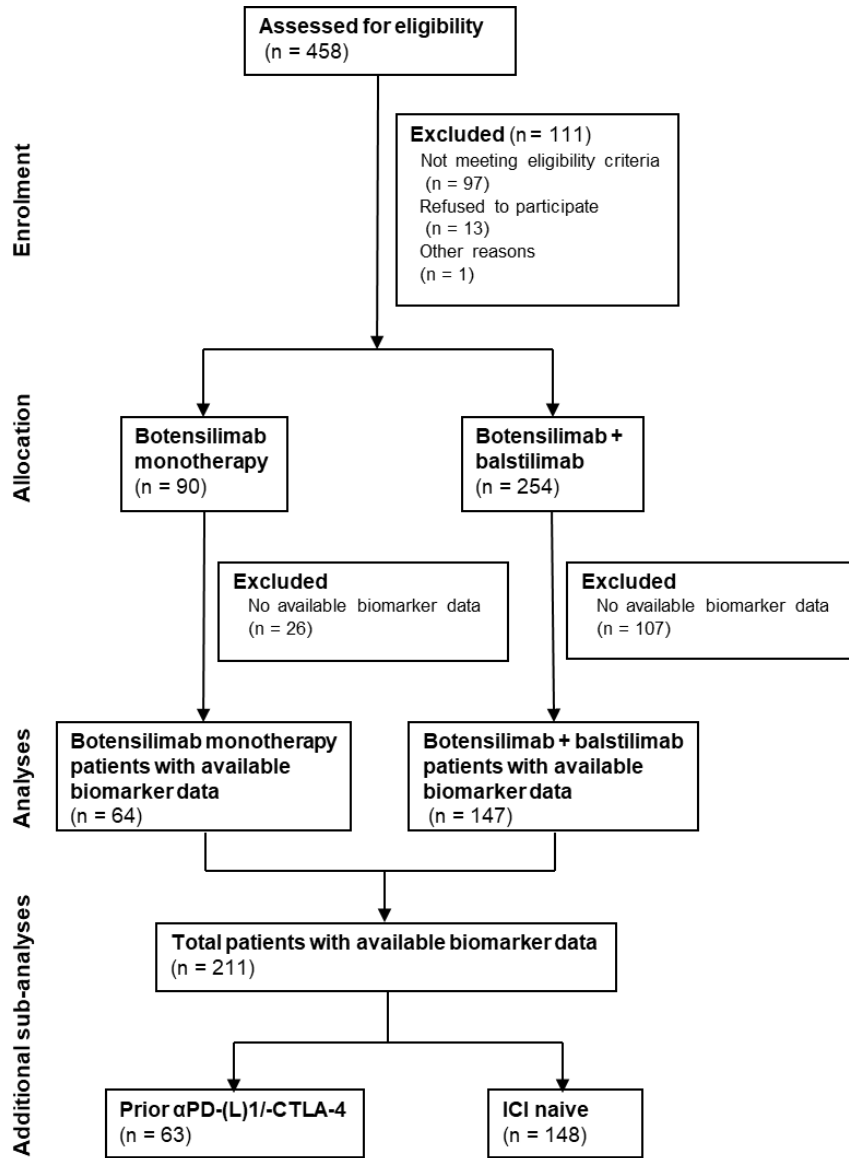

2

3 **Supplementary Figure S11.** CONSORT flow diagram depicting the patients with advanced solid  
 4 cancers enrolled in the expanded phase I trial (NCT03860272), between 1 April 2019 and 27  
 5 March 2023 and where biomarker data was available. CONSORT; Consolidated Standards of  
 6 Reporting Trials.
