# Supplementary material for: Botensilimab, an Fc-Enhanced Anti–CTLA-4 Antibody, Is Effective against Tumors Poorly Responsive to Conventional Immunotherapy
Source: PubMed Central journal article supplement — Cancer Discov. 2024 Jul 31;14(12):2407–29. doi: 10.1158/2159-8290.CD-24-0190 (PMC11609826; doi:10.1158/2159-8290.cd-24-0190), 2024-07-31
Supplement: cd-24-0190_supplementary_figure_s12_suppsf12.pdf [file cd-24-0190_supplementary_figure_s12_suppsf12.pdf]

1 **Supplementary Figure S12**

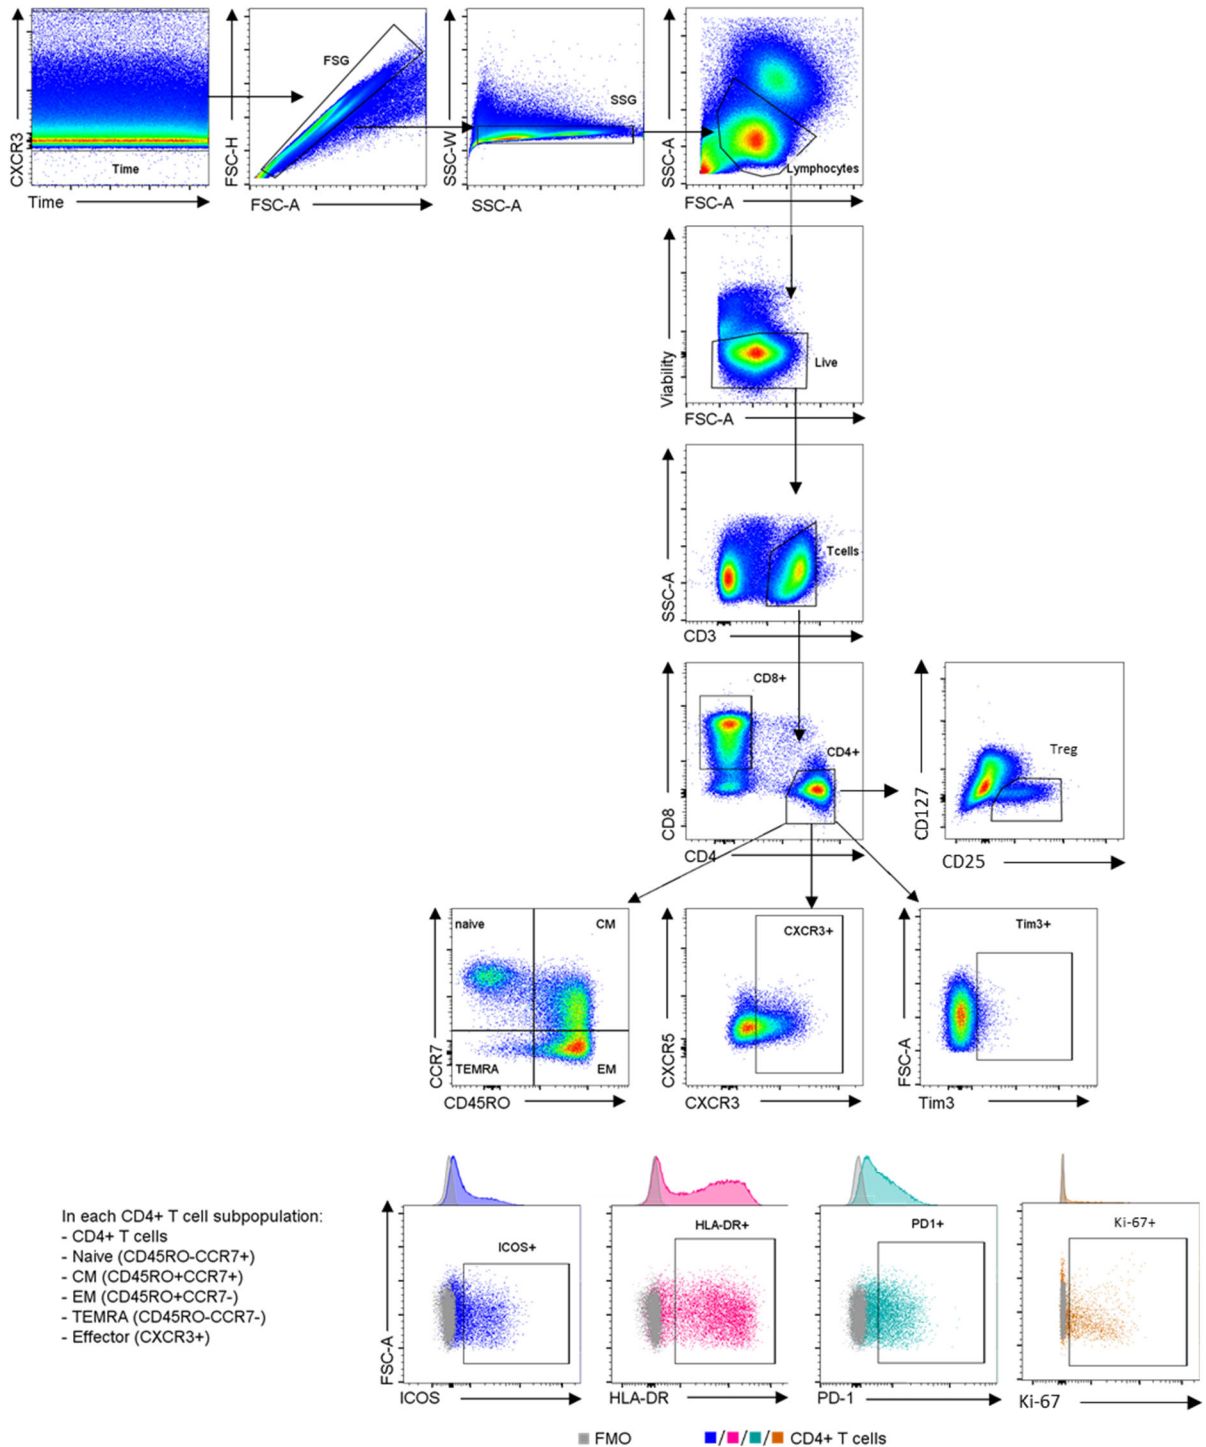

2

3 **Supplementary Figure S12. Gating strategy for T cell immune profiling in cryopreserved**

4 **PBMCs from botensilimab-treated patients with advanced solid cancers. Representative**

5 flow cytometry sequential gating steps for CD4<sup>+</sup> T cell subsets are shown. Naïve cells (CD45RO<sup>-</sup>  
6 CCR7<sup>+</sup>), central memory (CD45RO<sup>+</sup> CCR7<sup>+</sup>), effector memory (CD45RO<sup>+</sup> CCR7<sup>-</sup>), terminally  
7 differentiated effector memory cells (TEMRA, CD45RO<sup>-</sup> CCR7<sup>-</sup>), effector (CXCR3<sup>+</sup>) cells and  
8 Tregs (CD127<sup>low/-</sup>, CD25<sup>+</sup>) were defined in each CD4<sup>+</sup> T cell subpopulation.
