# Supplementary material for: Botensilimab, an Fc-Enhanced Anti–CTLA-4 Antibody, Is Effective against Tumors Poorly Responsive to Conventional Immunotherapy
Source: PubMed Central journal article supplement — Cancer Discov. 2024 Jul 31;14(12):2407–29. doi: 10.1158/2159-8290.CD-24-0190 (PMC11609826; doi:10.1158/2159-8290.cd-24-0190), 2024-07-31
Supplement: cd-24-0190_supplementary_figure_s13_suppsf13.pdf [file cd-24-0190_supplementary_figure_s13_suppsf13.pdf]

1 Supplementary Figure S13

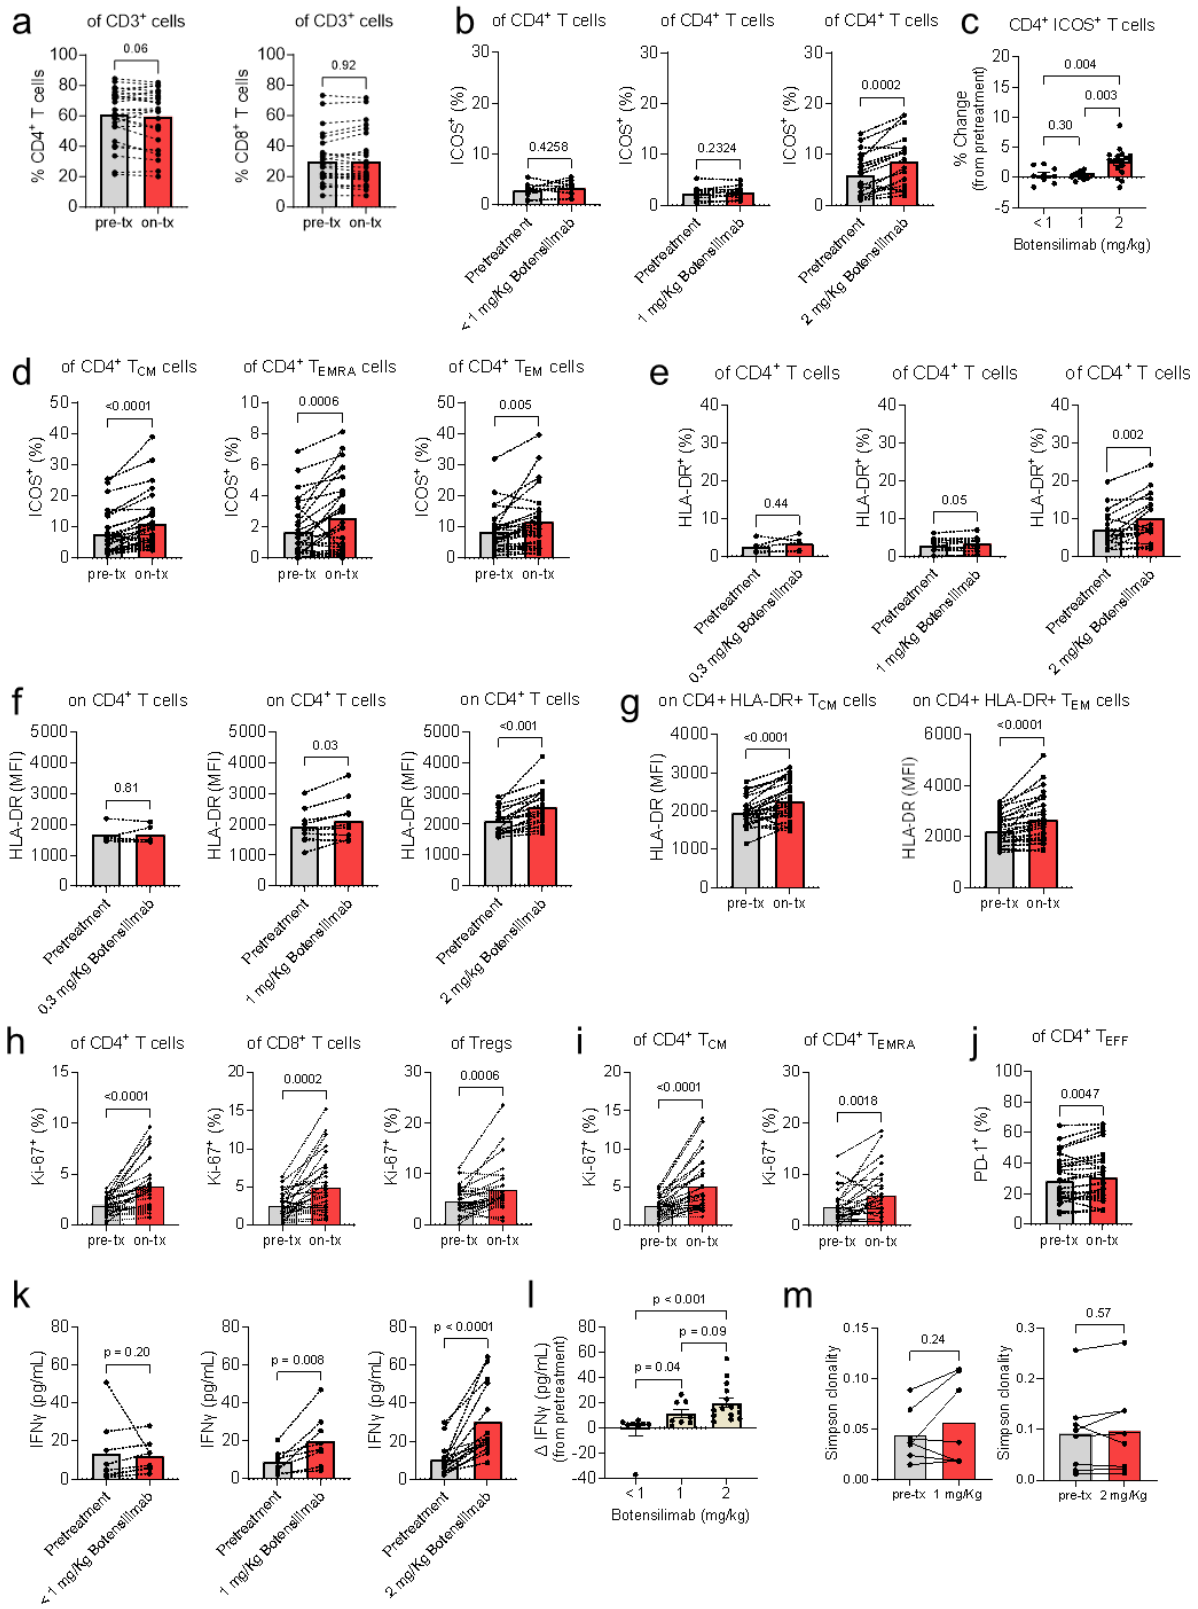

3 **Supplementary Figure S13. Botensilimab induces a dose-dependent increase in peripheral**  
4 **ICOS<sup>+</sup> Ki-67<sup>+</sup> and HLA-DR<sup>+</sup> T cells and IFN $\gamma$  in patients with advanced solid cancers.** Pre-  
5 and on-treatment blood samples were obtained from patients (n = 37) treated with 0.1, 0.3, 1 or  
6 2 mg/kg botensilimab monotherapy. On-treatment blood was drawn 7 days after the first dose.  
7 Samples were analyzed by flow cytometry from cryopreserved peripheral blood mononuclear cells  
8 to assess **(a)** the frequency of CD4<sup>+</sup> and CD8<sup>+</sup> T cells from patients treated with 1 and 2 mg/kg of  
9 botensilimab (n =28), **(b)** the frequency of ICOS on CD4<sup>+</sup> T cells from patients treated with 0.1  
10 mg/kg (n=4), 0.3 mg/kg (n=5), 1 mg/kg (n=10) and 2 mg/kg (n=18) of botensilimab, **(c)** change in  
11 frequency of ICOS on CD4<sup>+</sup> T cells from baseline for each dose cohort, **(d)** the frequency of ICOS  
12 on CD4<sup>+</sup> central memory (T<sub>CM</sub>, CD45RO<sup>+</sup>CCR7<sup>+</sup>), terminally differentiated effector memory cells  
13 (T<sub>EMRA</sub>, CD45RO<sup>-</sup>CCR7<sup>-</sup>) and effector memory (T<sub>EM</sub>, CD45RO<sup>+</sup>CCR7<sup>-</sup>) T cell subsets from patients  
14 treated with 1 and 2 mg/kg botensilimab (n =28), **(e)** the frequency of HLA-DR<sup>+</sup> and **(f)** HLA-DR  
15 mean fluorescence intensity (MFI) on CD4<sup>+</sup> T cells from patients treated with 0.3 mg/kg (n=5), 1  
16 mg/kg (n=10) and 2 mg/kg (n=18) botensilimab. **(g)** HLA-DR expression on CD4<sup>+</sup> T<sub>CM</sub> and T<sub>EM</sub> T  
17 cells. **(h)** Frequency of Ki-67<sup>+</sup> CD4<sup>+</sup>, CD8<sup>+</sup>, regulatory T cells (Tregs, CD4<sup>+</sup>, CD127<sup>low/-</sup>, CD25<sup>+</sup>),  
18 **(i)** CD4<sup>+</sup> T<sub>CM</sub> and T<sub>EMRA</sub> T cells, and **(j)** PD-1 on CD4<sup>+</sup> effector (T<sub>EFF</sub>; CXCR3<sup>+</sup>) T cells from patients  
19 treated with 1 and 2 mg/kg of botensilimab (n=28). **(k)** Peripheral interferon gamma (IFN $\gamma$ ) levels  
20 at pre- and on-treatment in plasma samples from patients treated with 0.1 or 0.3 (<1 mg/kg), 1 or  
21 2 mg/kg botensilimab monotherapy (n=31). **(l)** Change in IFN $\gamma$  secretion from baseline for each  
22 dose cohort. On-treatment blood was drawn 24 hours after the first dose and samples analyzed  
23 using a Meso Scale Discovery electrochemiluminescence assay. **(m)** Changes in blood T cell  
24 receptor (TCR) Simpson clonality from patients treated with 1 mg/kg (n=7) or 2 mg /kg (n=8) of  
25 botensilimab. Data are represented as paired data points with group mean **(a, b, d-k, m)** or mean  
26  $\pm$  s.e.m. **(c, l)**. Data were analyzed with a two-tailed Wilcoxon matched-paired t test **(a, b, d-k, m)**

- 27 or one-way ANOVA followed by a Kruskal-Wallis with a Benjamini, Krieger and Yekutieli's multiple  
28 comparison test **(c, I)**.
