# Supplementary material for: Botensilimab, an Fc-Enhanced Anti–CTLA-4 Antibody, Is Effective against Tumors Poorly Responsive to Conventional Immunotherapy
Source: PubMed Central journal article supplement — Cancer Discov. 2024 Jul 31;14(12):2407–29. doi: 10.1158/2159-8290.CD-24-0190 (PMC11609826; doi:10.1158/2159-8290.cd-24-0190), 2024-07-31
Supplement: cd-24-0190_supplementary_figure_s14_suppsf14.pdf [file cd-24-0190_supplementary_figure_s14_suppsf14.pdf]

1 **Supplementary Figure S14**

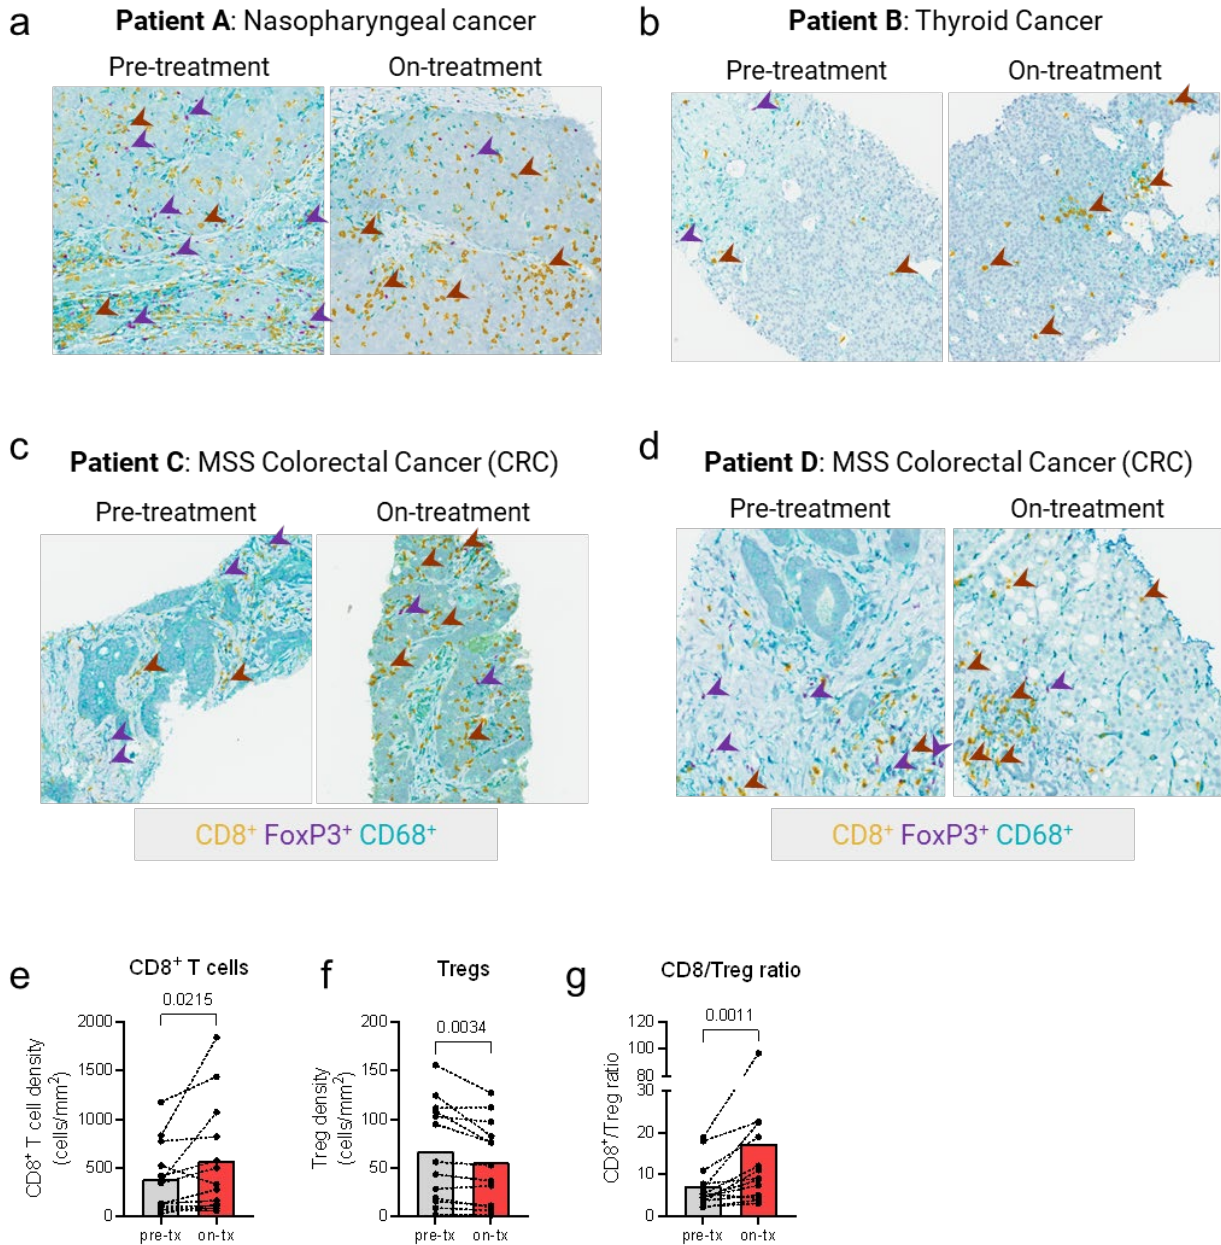

2

3 **Supplementary Figure S14. Intratumoral Tregs and CD8<sup>+</sup> T cell staining in patients with**  
 4 **advanced solid cancers treated with botensilimab.** Triplex chromogenic  
 5 immunohistochemistry on pre-treatment and on-treatment formalin fixed, paraffin-embedded  
 6 tumor biopsies from patients treated with botensilimab monotherapy or in combination with

7 balstilimab ( $\alpha$ PD-1). **(a)** Patient A, nasopharyngeal cancer (2 mg/kg botensilimab every three  
8 weeks); **(b)** Patient B, thyroid cancer (2 mg/kg botensilimab every three weeks); **(c)** Patient C,  
9 MSS-CRC (2 mg/kg botensilimab Q6W + 3 mg/kg balstilimab every two weeks); **(d)** Patient D,  
10 MSS-CRC (1 mg/kg botensilimab every six weeks + 3 mg/kg balstilimab every 2 weeks). **(e)**  
11 Quantitative analysis of **(e)** CD8<sup>+</sup> T cells and **(f)** Treg cell densities, and **(g)** CD8/Treg ratio in  
12 paired biopsies from 13 patients treated with botensilimab monotherapy or in combination with  
13 balstilimab. Only samples with sufficient tissue and staining quality and containing  $\geq 100$  tumor  
14 cells were evaluated. On-treatment biopsies were taken on cycle 2 day 1 for every six-week cohort  
15 or cycle 3 day 1 for every three-week cohort. CD8 (yellow), FoxP3 (purple) CD68 (turquoise) are  
16 shown. Tregs were defined as FoxP3<sup>+</sup>/CD8<sup>-</sup> cells. Data are represented as paired data points  
17 with group mean and analyzed with a two-tailed Wilcoxon matched-paired t test **(e, f)** ratio paired  
18 *t*-test **(g)**.
