# Supplementary material for: Botensilimab, an Fc-Enhanced Anti–CTLA-4 Antibody, Is Effective against Tumors Poorly Responsive to Conventional Immunotherapy
Source: PubMed Central journal article supplement — Cancer Discov. 2024 Jul 31;14(12):2407–29. doi: 10.1158/2159-8290.CD-24-0190 (PMC11609826; doi:10.1158/2159-8290.cd-24-0190), 2024-07-31
Supplement: cd-24-0190_supplementary_figure_s15_suppsf15.pdf [file cd-24-0190_supplementary_figure_s15_suppsf15.pdf]

1 **Supplementary Figure S15**

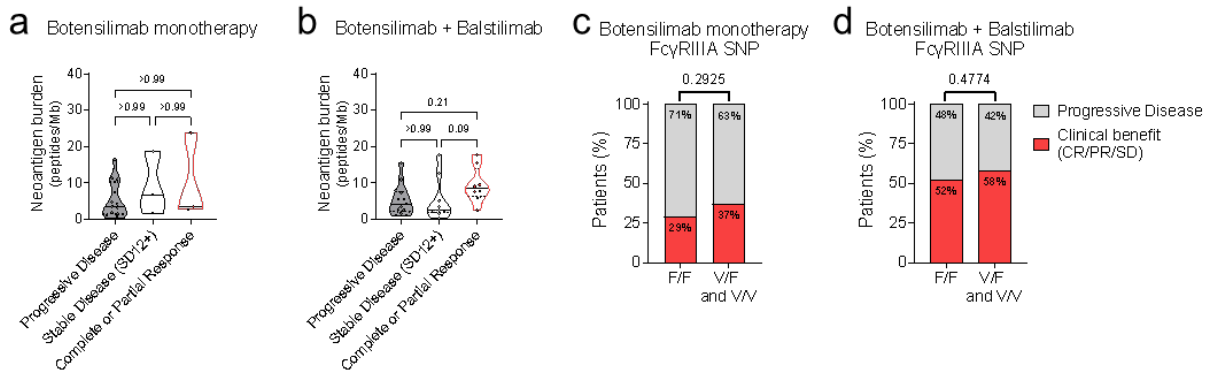

2

3 **Supplementary Figure S15. Response to botensilimab monotherapy or in combination with**  
 4 **balstilimab, in patients with advanced cancers, is independent of neoantigen burden or**  
 5 **FcγRIIIA allele status.** Response by tumor neoantigen burden (TNB) at baseline (pre-treatment)  
 6 in patients with advanced solid cancers treated with **(a)** botensilimab monotherapy (TNB: n=35)  
 7 or **(b)** botensilimab in combination with balstilimab (TNB: n=78). TNB was assessed by whole  
 8 exome sequencing and defined as peptides/Mb that originate from tumor-specific non-  
 9 synonymous somatic variants with predicted HLA binding affinity <500nM (NetMHC Pan  
 10 prediction). Clinical benefit by FcγRIIIA genotype in patients with advanced solid cancers treated  
 11 with **(c)** botensilimab monotherapy (FcγRIIIA genotype: n=33) or **(d)** botensilimab in combination  
 12 with balstilimab (FcγRIIIA genotype: n=71). Clinical benefit was defined as patients who had a  
 13 complete response (CR), partial response (PR) or stable disease (SD) for ≥12 weeks as per  
 14 RECIST 1.1. Data were analyzed with a one-way ANOVA Kruskal-Wallis test with a Dunn's  
 15 multiple comparisons test **(a, b)** or Fisher's exact test **(c, d)**.
