# Supplementary material for: Botensilimab, an Fc-Enhanced Anti–CTLA-4 Antibody, Is Effective against Tumors Poorly Responsive to Conventional Immunotherapy
Source: PubMed Central journal article supplement — Cancer Discov. 2024 Jul 31;14(12):2407–29. doi: 10.1158/2159-8290.CD-24-0190 (PMC11609826; doi:10.1158/2159-8290.cd-24-0190), 2024-07-31
Supplement: cd-24-0190_supplementary_figure_s17_suppsf17.pdf [file cd-24-0190_supplementary_figure_s17_suppsf17.pdf]

1 **Supplementary Figure S17**

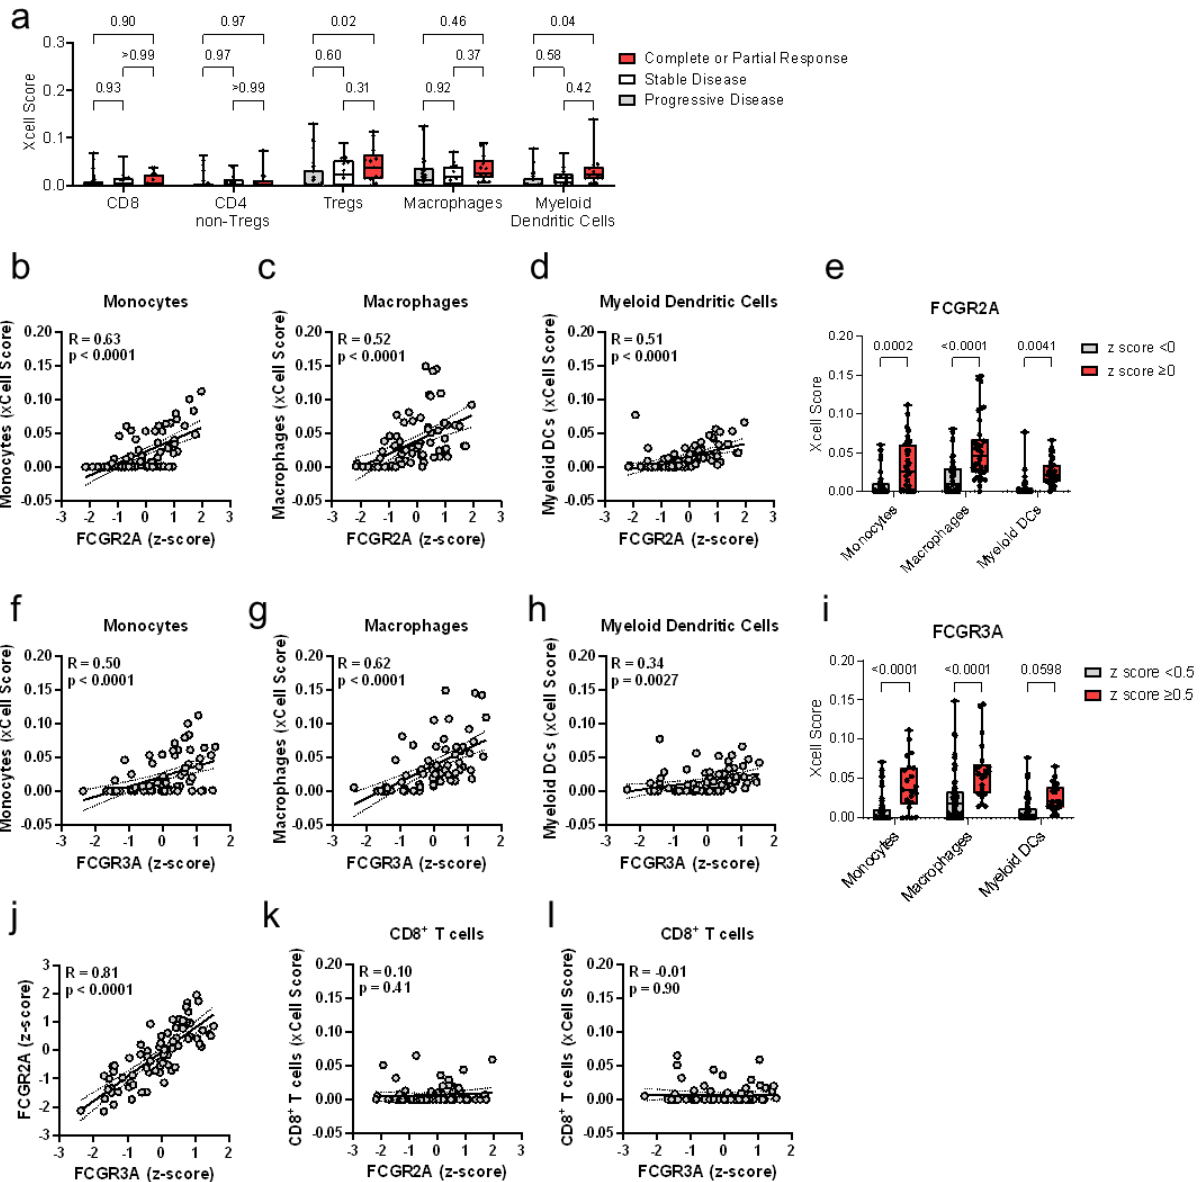

2

3 **Supplementary Figure S17. FCGR2A and FCGR3A bulk RNA-seq expression z-scores**

4 **correlation with immune cell type enrichment scores. (a)** Intratumoral cell type fraction of  
 5 macrophages, myeloid dendritic cells, monocytes, CD8<sup>+</sup> T cells, CD4<sup>+</sup> non-Tregs and Tregs in  
 6 pre-treatment tumor biopsies from patients with a variety of solid cancers treated with  
 7 botensilimab ± balstilimab (n=55), as determined from gene set enrichment analysis of bulk RNA-

8 seq data by xCell. In violin plots, the center line represents the median. **(b-d)** Intratumoral **(b)**  
9 monocyte, **(c)** macrophage and **(d)** myeloid dendritic cell type enrichment scores from pre-  
10 treatment tumor biopsies obtained by xCell gene set enrichment analysis of bulk RNA-seq data  
11 (y-axis) plotted against FCGR2A bulk RNA-seq gene expression z-scores (x-axis) (n=74). **(e)**  
12 xCell enrichment score for monocytes, macrophages and myeloid DCs cell types by FCGR2A (n=  
13 40 with z-score <0 and n=34 with z-score ≥0) high versus low expression. **(f-h)** Intratumoral **(f)**  
14 monocyte, **(g)** macrophage and **(h)** myeloid dendritic cell type enrichment scores plotted against  
15 FCGR3A bulk RNA-seq gene expression z-scores (x-axis) (n=74). **(i)** xCell enrichment score for  
16 monocytes, macrophages and myeloid DCs cell types by FCGR3A (n= 53 with z-score <0.5 and  
17 n=21 with z-score ≥0.5) high versus low expression. **(j)** FCGR2A (y-axis) plotted against FCGR3A  
18 (x-axis) bulk RNA-seq gene expression z-scores (n=74). **(k)** FCGR2A and **(l)** FCGR3A correlation  
19 with CD8<sup>+</sup> T cells from pre-treatment tumor biopsies obtained by xCell gene set enrichment  
20 analysis of bulk RNA-seq data (n=74). Data were analyzed with a two-way ANOVA followed by  
21 **(a)** Tukey's multiple comparisons test or **(e, i)** Šídák's multiple comparisons test. The correlation  
22 coefficient R, and the p-value (p) of the simple linear regression is indicated on the graph **(b-d, f-**  
23 **h, j-l)**.
