# Supplementary material for: Botensilimab, an Fc-Enhanced Anti–CTLA-4 Antibody, Is Effective against Tumors Poorly Responsive to Conventional Immunotherapy
Source: PubMed Central journal article supplement — Cancer Discov. 2024 Jul 31;14(12):2407–29. doi: 10.1158/2159-8290.CD-24-0190 (PMC11609826; doi:10.1158/2159-8290.cd-24-0190), 2024-07-31
Supplement: cd-24-0190_supplementary_table_s1_suppst1.pdf [file cd-24-0190_supplementary_table_s1_suppst1.pdf]

- 1 **Supplementary Table S1.** Binding affinities of mouse  $\alpha$ CTLA-4 antibodies to mouse Fc $\gamma$ RIIB and  
 2 Fc $\gamma$ RIV proteins as determined by surface plasmon resonance (SPR).

| Mouse $\alpha$ CTLA-4 | Binding affinity $K_D$ (M) |                       | A/I Ratio                        |
|-----------------------|----------------------------|-----------------------|----------------------------------|
|                       | Fc $\gamma$ RIV            | Fc $\gamma$ RIIB      | Fc $\gamma$ RIV/Fc $\gamma$ RIIB |
| IgG2a                 | $4.01 \times 10^{-9}$      | $7.23 \times 10^{-6}$ | 1805                             |
| IgG2b <sup>DLE</sup>  | $9.90 \times 10^{-10}$     | $3.27 \times 10^{-6}$ | 3304                             |
| IgG2b                 | $6.43 \times 10^{-8}$      | $1.50 \times 10^{-5}$ | 233                              |

- 3 Equilibrium dissociation constant (KD) values were calculated from the kinetic rate constants (ka  
 4 and kd) obtained from the sensorgrams. The activating to inhibitory (A/I) ratio, defined as the ratio  
 5 of binding affinity of an IgG subtype to activating Fc $\gamma$ RIV relative to the inhibitory Fc $\gamma$ RIIB, is  
 6 presented for each antibody.
