# Supplementary material for: Botensilimab, an Fc-Enhanced Anti–CTLA-4 Antibody, Is Effective against Tumors Poorly Responsive to Conventional Immunotherapy
Source: PubMed Central journal article supplement — Cancer Discov. 2024 Jul 31;14(12):2407–29. doi: 10.1158/2159-8290.CD-24-0190 (PMC11609826; doi:10.1158/2159-8290.cd-24-0190), 2024-07-31
Supplement: cd-24-0190_supplementary_table_s2_suppst2.pdf [file cd-24-0190_supplementary_table_s2_suppst2.pdf]

1 **Supplementary Table S2.** Binding affinities of botensilimab and parental IgG1  $\alpha$ CTLA-4  
 2 antibodies to human Fc $\gamma$ RIIB, Fc $\gamma$ RIIIA V158, and Fc $\gamma$ RIIIA F158 proteins as determined by  
 3 surface plasmon resonance (SPR).

| Human $\alpha$ CTLA-4 | Binding affinity $K_D$ (M) |                          |                       | A/I Ratio                                 |                                           |
|-----------------------|----------------------------|--------------------------|-----------------------|-------------------------------------------|-------------------------------------------|
|                       | Fc $\gamma$ RIIIA (F158)   | Fc $\gamma$ RIIIA (V158) | Fc $\gamma$ RIIB      | Fc $\gamma$ RIIIA (F158)/Fc $\gamma$ RIIB | Fc $\gamma$ RIIIA (V158)/Fc $\gamma$ RIIB |
| <b>Botensilimab</b>   | $2.68 \times 10^{-9}$      | $2.55 \times 10^{-9}$    | $3.12 \times 10^{-6}$ | 1164                                      | 1224                                      |
| <b>Parental IgG1</b>  | $6.65 \times 10^{-8}$      | $3.12 \times 10^{-8}$    | $9.48 \times 10^{-6}$ | 143                                       | 303                                       |

4 Equilibrium dissociation constant (KD) values were calculated from the kinetic rate constants (ka  
 5 and kd) obtained from the sensorgrams. The activating to inhibitory (A/I) ratio, defined as the ratio  
 6 of binding affinity of an IgG subtype to activating Fc $\gamma$ RIIIA relative to the inhibitory Fc $\gamma$ RIIB, is  
 7 presented for each antibody.
