# Supplementary material for: Botensilimab, an Fc-Enhanced Anti–CTLA-4 Antibody, Is Effective against Tumors Poorly Responsive to Conventional Immunotherapy
Source: PubMed Central journal article supplement — Cancer Discov. 2024 Jul 31;14(12):2407–29. doi: 10.1158/2159-8290.CD-24-0190 (PMC11609826; doi:10.1158/2159-8290.cd-24-0190), 2024-07-31
Supplement: cd-24-0190_supplementary_table_s3_suppst3.pdf [file cd-24-0190_supplementary_table_s3_suppst3.pdf]

- 1 **Supplementary Table S3.** Table showing the epitope (red) of botensilimab, ipilimumab and
- 2 tremelimumab on human CTLA-4.

| Antibody            | Human CTLA-4 Epitope                                                                                                                         | Reference |
|---------------------|----------------------------------------------------------------------------------------------------------------------------------------------|-----------|
| <b>Botensilimab</b> | KAMHVAQPAVVLASSRGIASFVCEYASPGKATEVRVTVLRQADSQVTEVC<br>AATYMMGNELTFLDDSICTGTSSGNQVNLTIQGLRAMDTGLYICKVELMYP<br>PPYYLGI <del>GNGTQI</del> YVIDP | 34*       |
| <b>Ipilimumab</b>   | KAMHVAQPAVVLASSRGIASFVCEYASPGKATEVRVTVLRQADSQVTEVC<br>AATYMMGNELTFLDDSICTGTSSGNQVNLTIQGLRAMDTGLYICKVELMYP<br>PPYYLGI <del>GNGTQI</del> YVIDP | 35        |
| <b>Tremelimumab</b> | KAMHVAQPAVVLASSRGIASFVCEYASPGKATEVRVTVLRQADSQVTEVC<br>AATYMMGNELTFLDDSICTGTSSGNQVNLTIQGLRAMDTGLYICKVELMYP<br>PPYYLGI <del>GNGTQI</del> YVIDP | 36        |

3 \*Botensilimab contains the same variable regions as AGEN1884. Epitope highlighted in red.

4 Source: <sup>34</sup>[Gombos et al., 2018](#); <sup>35</sup>[Ramagopal et al., 2017](#); <sup>36</sup>[Lee et al., 2016](#).
