# Supplementary material for: Botensilimab, an Fc-Enhanced Anti–CTLA-4 Antibody, Is Effective against Tumors Poorly Responsive to Conventional Immunotherapy
Source: PubMed Central journal article supplement — Cancer Discov. 2024 Jul 31;14(12):2407–29. doi: 10.1158/2159-8290.CD-24-0190 (PMC11609826; doi:10.1158/2159-8290.cd-24-0190), 2024-07-31
Supplement: cd-24-0190_supplementary_table_s4_suppst4.pdf [file cd-24-0190_supplementary_table_s4_suppst4.pdf]

1 **Supplementary Table S4: Toxicology overview of botensilimab-related microscopic**  
 2 **findings from 13-week repeat-dose study in cynomolgus monkeys.**

| Group                                                                                          | Males (n) |          |           |           | Females (n) |          |           |           |
|------------------------------------------------------------------------------------------------|-----------|----------|-----------|-----------|-------------|----------|-----------|-----------|
|                                                                                                | 1         | 2        | 3         | 4         | 1           | 2        | 3         | 4         |
| <b>Dose (mg/kg/dose)</b>                                                                       | <b>0</b>  | <b>5</b> | <b>25</b> | <b>75</b> | <b>0</b>    | <b>5</b> | <b>25</b> | <b>75</b> |
| <b>No. Animals Examined</b>                                                                    | <b>3</b>  | <b>3</b> | <b>3</b>  | <b>2</b>  | <b>3</b>    | <b>3</b> | <b>3</b>  | <b>3</b>  |
| <b>Adrenal gland</b><br>Peripheral; Infiltration, Mixed;<br>Vascular/Perivascular;             | 0         | 0        | 0         | 1         | 0           | 0        | 0         | 0         |
| <b>Aorta</b><br>Peripheral; Infiltration, Mixed;<br>Vascular/Perivascular                      | 0         | 0        | 0         | 1         | 0           | 0        | 0         | 0         |
| <b>Brain</b><br>Perivascular; Infiltration, Mononuclear                                        | 0         | 0        | 1         | 0         | 0           | 0        | 1         | 2         |
| <b>Brain</b><br>Interstitium; Infiltration, Mononuclear; Choroid Plexus                        | 0         | 0        | 1         | 0         | 0           | 0        | 0         | 3         |
| <b>Cervix</b><br>Peripheral; Infiltration, Mixed;<br>Vascular/Perivascular                     | N/A       | N/A      | N/A       | N/A       | 0           | 1        | 0         | 1         |
| <b>Epididymides;</b><br>Interstitium; Infiltration, Mixed;<br>Vascular/Perivascular; Bilateral | 0         | 0        | 1         | 1         | N/A         | N/A      | N/A       | N/A       |
| <b>Esophagus</b><br>Muscularis; Infiltration, Mixed;<br>Vascular/Perivascular                  | 0         | 0        | 0         | 1         | 0           | 0        | 0         | 0         |
| <b>Heart</b><br>Ventricle; Degeneration; Vacuolar; Multifocal                                  | 0         | 1        | 1         | 0         | 0           | 0        | 0         | 0         |
| <b>Heart</b><br>Pericardial Adipose Tissue; Infiltration, Mixed;<br>Vascular/Perivascular      | 0         | 0        | 0         | 1         | 0           | 0        | 0         | 1         |
| <b>Heart</b><br>Tunica Media; Hypertrophy; Pericardial Adipose Tissue; Vascular                | 0         | 0        | 1         | 0         | 0           | 0        | 0         | 0         |
| <b>Kidneys</b><br>Infiltration, Mixed; Vascular/Perivascular                                   | 0         | 0        | 1         | 1         | 0           | 1        | 1         | 0         |
| <b>Kidneys</b>                                                                                 | 0         | 0        | 0         | 0         | 0           | 0        | 0         | 3         |

|                                                                                              |   |   |   |   |     |     |     |     |
|----------------------------------------------------------------------------------------------|---|---|---|---|-----|-----|-----|-----|
| Cortex; Infiltration, Mononuclear                                                            |   |   |   |   |     |     |     |     |
| <b>Large Intestine, Cecum</b><br>Submucosa; Infiltration, Mixed;<br>Vascular/Perivascular    | 0 | 0 | 0 | 1 | 0   | 1   | 0   | 0   |
| <b>Large Intestine, Colon</b><br>Serosa; Infiltration, Mixed;<br>Vascular/Perivascular       | 0 | 0 | 0 | 1 | 0   | 0   | 0   | 0   |
| <b>Large Intestine, Rectum</b><br>Muscularis; Infiltration, Mixed;<br>Vascular/Perivascular  | 0 | 0 | 0 | 1 | 0   | 1   | 0   | 0   |
| <b>Liver</b><br>Interstitial; Infiltration, Mononuclear; Choroid Plexus                      | 0 | 0 | 1 | 0 | 0   | 0   | 0   | 0   |
| <b>Liver</b><br>Bile Duct; Necrosis; Epithelial; Focal                                       | 0 | 0 | 1 | 0 | 0   | 0   | 0   | 0   |
| <b>Liver</b><br>Peripheral; Infiltration, Mixed;<br>Vascular/Perivascular                    | 0 | 0 | 0 | 1 | 0   | 0   | 0   | 0   |
| <b>Lungs</b><br>Interstitial; Infiltration, Mixed;<br>Vascular/Perivascular                  | 0 | 0 | 0 | 1 | 0   | 0   | 0   | 0   |
| <b>Nerves, Sciatic</b><br>Peripheral; Infiltration, Mixed;<br>Vascular/Perivascular          | 0 | 0 | 0 | 1 | 0   | 0   | 0   | 0   |
| <b>Prostate Gland</b><br>Stroma; Infiltration, Mixed;<br>Vascular/Perivascular               | 0 | 0 | 0 | 1 | N/A | N/A | N/A | N/A |
| <b>Seminal Vesicles</b><br>Interstitial; Infiltration, Mixed;<br>Vascular/Perivascular       | 0 | 0 | 0 | 1 | N/A | N/A | N/A | N/A |
| <b>Small Intestines, Duodenum</b><br>Serosa; Infiltration, Mixed;<br>Vascular/Perivascular   | 0 | 0 | 0 | 0 | 0   | 1   | 0   | 0   |
| <b>Small Intestines, Jejunum</b><br>Submucosa; Infiltration, Mixed;<br>Vascular/Perivascular | 0 | 0 | 0 | 1 | 0   | 0   | 0   | 0   |
| <b>Stomach</b>                                                                               | 0 | 0 | 0 | 1 | 0   | 1   | 0   | 0   |

|                                                                                        |     |     |     |     |     |     |     |     |
|----------------------------------------------------------------------------------------|-----|-----|-----|-----|-----|-----|-----|-----|
| Serosa; Infiltration,<br>Mixed;<br>Vascular/Perivascular                               |     |     |     |     |     |     |     |     |
| <b>Testes</b><br>Infiltration, Mixed;<br>Vascular/Perivascular                         | 0   | 0   | 0   | 1   | N/A | N/A | N/A | N/A |
| <b>Thymus</b><br>Infiltration, Mixed;<br>Vascular/Perivascular                         | 0   | 0   | 0   | 1   | 0   | 0   | 0   | 0   |
| <b>Urinary Bladder</b><br>Muscularis; Infiltration,<br>Mixed;<br>Vascular/Perivascular | 0   | 0   | 0   | 1   | 0   | 0   | 0   | 0   |
| <b>Vagina</b><br>Peripheral; Infiltration,<br>Mixed;<br>Vascular/Perivascular          | N/A | N/A | N/A | N/A | 0   | 0   | 0   | 1   |
| <b>Uterus</b><br>Myometrium; Infiltration,<br>Mixed;<br>Vascular/Perivascular          | N/A | N/A | N/A | N/A | 0   | 1   | 0   | 2   |

- 3 Data represent incidence (number of animals affected) for all grades of the microscopic finding,  
 4 grouped by treatment and sex.
