# Supplementary material for: Botensilimab, an Fc-Enhanced Anti–CTLA-4 Antibody, Is Effective against Tumors Poorly Responsive to Conventional Immunotherapy
Source: PubMed Central journal article supplement — Cancer Discov. 2024 Jul 31;14(12):2407–29. doi: 10.1158/2159-8290.CD-24-0190 (PMC11609826; doi:10.1158/2159-8290.cd-24-0190), 2024-07-31
Supplement: cd-24-0190_supplementary_table_s5_suppst5.pdf [file cd-24-0190_supplementary_table_s5_suppst5.pdf]

1 **Supplementary Table S5: Serum pharmacokinetic parameters for botensilimab following**  
 2 **once weekly intravenous administration at 5, 25, or 75 mg/kg/dose to male and female**  
 3 **cynomolgus monkeys for 13 weeks.**

| Dose (mg/kg) | Study Day | Sex | Cmax (µg/mL) | Tmax (h)        | AUC <sub>0-last</sub> (h*µg/mL) | T1/2 (h)              | Cl (mL/h/kg)   | Vss (mL/kg) | AUC <sub>0-inf</sub> (h*µg/mL) |
|--------------|-----------|-----|--------------|-----------------|---------------------------------|-----------------------|----------------|-------------|--------------------------------|
| 5            | 1         | M   | 314 ± 123    | 1.2 (0.3 - 1.2) | 18,700 ± 4,900                  | 213.6                 | 0.137          | 36.2        | 40,300                         |
|              |           | F   | 2960 ± 70.8  | 0.4 (0.3 - 1.2) | 22,400 ± 60,200                 | 187.4                 | 0.117          | 29.9        | 43,900                         |
|              | 85        | M   | 591          | 1.2             | 57,400                          | 159                   | 0.046          | 8.72        | 128,000                        |
|              |           | F   | 478 ± 355    | 0.4 (0.3 - 8.2) | 46,800 ± 46,100                 | 181.5                 | 3.31           | 30.3        | 93,900                         |
| 25           | 1         | M   | 969 ± 79.8   | 0.3 (0.3 - 1.2) | 74,100 ± 12,000                 | 146.7 (107.8 - 407.5) | 0.147 ± 0.052  | 39.3 ± 14.2 | 185,000 ± 64,900               |
|              |           | F   | 9910 ± 204   | 0.4 (0.3 - 1.2) | 71,300 ± 15,300                 | 130.1 (96.6 - 135.3)  | 0.198 ± 3.01   | 34.7 ± 6.18 | 135,000 ± 38,800               |
|              | 85        | M   | 1300 ± 596   | 0.4 (0.3 - 1.2) | 92,300 ± 77,800                 | 106.8 (4.5 - 332.1)   | 1.82 ± 3.01    | 24.9 ± 8.10 | 257,000 ± 286,000              |
|              |           | F   | 1980 ± 105   | 0.3 (0.3 - 0.4) | 187,000 ± 5,300                 | 214.7 (193.2 - 342.9) | 0.045 ± 0.009  | 15.7 ± 1.19 | 569,000 ± 131,000              |
| 75           | 1         | M   | 3050 ± 633   | 1.2 (0.4 - 1.2) | 217,000 ± 59,500                | 120.0 (114.9 - 171.1) | 0.219 ± 0.110  | 39.5 ± 15.0 | 391,000 ± 132,000              |
|              |           | F   | 2980 ± 281   | 0.4 (0.3 - 1.2) | 225,000 ± 27,700                | 153.5 (133.4 - 271.9) | 0.152 ± 0.0436 | 36.8 ± 5.37 | 524,000 ± 139,000              |
|              | 85        | M   | 5480 ± 810   | 0.4 (0.4 - 1.2) | 456,000 ± 92,200                | 100.3 (94.3 - 134.9)  | 0.098 ± 0.026  | 15.7 ± 2.72 | 805,000 ± 225,000              |
|              |           | F   | 5520 ± 1200  | 0.4 (0.3 - 1.2) | 422,000 ± 94,600                | 104.1 (98.1 - 142.9)  | 0.108 ± 0.034  | 17.5 ± 3.59 | 752,000 ± 242,000              |

4 PK parameters derived from a multi-dose intravenous administration of botensilimab to male (M)  
 5 and female (F) cynomolgus monkeys. Cl = clearance, Cmax = maximum concentration, AUC(0-  
 6 last) = area under curve to last, AUC (0-∞) = area under curve to infinity, T1/2 = half-life, Tmax =  
 7 time to maximum, and Vss = volume at steady state.
