# Supplementary material for: Botensilimab, an Fc-Enhanced Anti–CTLA-4 Antibody, Is Effective against Tumors Poorly Responsive to Conventional Immunotherapy
Source: PubMed Central journal article supplement — Cancer Discov. 2024 Jul 31;14(12):2407–29. doi: 10.1158/2159-8290.CD-24-0190 (PMC11609826; doi:10.1158/2159-8290.cd-24-0190), 2024-07-31
Supplement: cd-24-0190_supplementary_table_s6_suppst6.pdf [file cd-24-0190_supplementary_table_s6_suppst6.pdf]

- 1 **Supplementary Table S6.** Baseline demographics of patients with advanced solid tumors treated
- 2 with botensilimab monotherapy or botensilimab in combination with balstilimab.

| Characteristics                                   | Patients (N= 211) |
|---------------------------------------------------|-------------------|
| <b>Sex, n (%)</b>                                 |                   |
| Female                                            | 120 (57%)         |
| Male                                              | 91 (43%)          |
| <b>Age (years)</b>                                |                   |
| Mean ± s.d.                                       | 59 ± 12           |
| Median                                            | 59                |
| Range                                             | 19-83             |
| <b>ECOG performance status at baseline, n (%)</b> |                   |
| 0                                                 | 78 (37%)          |
| 1                                                 | 133 (63%)         |
| <b>Prior lines of therapy, n</b>                  |                   |
| Median (range)                                    | 3 (1-16)          |
| Prior anti-PD-(L)1 mAb therapy, n                 | 63                |
| Prior anti-CTLA-4 mAb therapy, n                  | 7                 |
| <b>Cancer type</b>                                |                   |
| MSS Colorectal cancer (CRC)                       | 96 (45%)          |
| Ovarian cancer (OC)                               | 26 (12%)          |
| Sarcoma (SARC)                                    | 15 (7%)           |
| Pancreatic cancer (PANC)                          | 10 (5%)           |
| Angiosarcoma (AS)                                 | 9 (4%)            |
| Melanoma (MEL)                                    | 9 (4%)            |
| Renal cell carcinoma (RCC)                        | 5 (2%)            |
| Ampullary of Vater carcinoma (AMPCA)              | 4 (2%)            |
| Hepatocellular Carcinoma (HCC)                    | 4 (2%)            |
| Non-Small Cell Lung Cancer (NSCLC)                | 4 (2%)            |
| Breast cancer (BRCA)                              | 3 (1%)            |
| Endometrial cancer (EC)                           | 3 (1%)            |
| Head and neck cancer (HNC)                        | 3 (1%)            |
| Anal cancer (ANCA)                                | 2 (1%)            |
| Cervical cancer (CC)                              | 2 (1%)            |
| Esophageal cancer (ESCA)                          | 2 (1%)            |
| Prostate cancer (PRCA)                            | 2 (1%)            |
| Thyroid carcinoma (THCA)                          | 2 (1%)            |
| Undetermined                                      | 2 (1%)            |
| Adrenocortical carcinoma (ACC)                    | 1 (0.5%)          |
| Cholangiocarcinoma (CCA)                          | 1 (0.5%)          |
| Fibrolamellar carcinoma                           | 1 (0.5%)          |
| Gallbladder cancer                                | 1 (0.5%)          |
| Gastric cancer                                    | 1 (0.5%)          |
| Mesothelioma                                      | 1 (0.5%)          |
| Testicular cancer                                 | 1 (0.5%)          |
| Uveal melanoma                                    | 1 (0.5%)          |
| <b>Treatment, n (%)</b>                           |                   |

|                                              |           |
|----------------------------------------------|-----------|
| Botensilimab monotherapy                     | 64 (30%)  |
| Botensilimab in combination with balstilimab | 147 (70%) |

3 s.d, standard deviation
