# Supplementary material for: Botensilimab, an Fc-Enhanced Anti–CTLA-4 Antibody, Is Effective against Tumors Poorly Responsive to Conventional Immunotherapy
Source: PubMed Central journal article supplement — Cancer Discov. 2024 Jul 31;14(12):2407–29. doi: 10.1158/2159-8290.CD-24-0190 (PMC11609826; doi:10.1158/2159-8290.cd-24-0190), 2024-07-31
Supplement: cd-24-0190_supplementary_table_s7_suppst7.pdf [file cd-24-0190_supplementary_table_s7_suppst7.pdf]

1 **Supplementary Table S7.** Summary of clinical response and disease control rates of patients  
 2 with advanced solid tumors treated with botensilimab monotherapy or botensilimab in combination  
 3 with balstilimab.

| Variable                                                                   | Botensilimab monotherapy (N=64) | Botensilimab + Balstilimab (N=147) | Prior αPD-(L)1/-CTLA-4 (N=63) | ICI Naïve (N= 148) | All Patients (N=211) |
|----------------------------------------------------------------------------|---------------------------------|------------------------------------|-------------------------------|--------------------|----------------------|
| <b>Objective Response Rate for confirmed responses</b>                     |                                 |                                    |                               |                    |                      |
| n (%)                                                                      | 4 (6.3)                         | 24 (16.3)                          | 10 (15.9)                     | 18 (12.2)          | 28 (13.3)            |
| 95% CI                                                                     | (1.7, 15.2)                     | (10.7, 23.3)                       | (7.9, 27.3)                   | (7.4, 18.5)        | (9.0, 18.6)          |
| <b>Best Overall Response by RECIST v1.1 for confirmed responses, n (%)</b> |                                 |                                    |                               |                    |                      |
| <b>Complete Response</b>                                                   | 1 (1.6)                         | 1 (0.7)                            | 1 (1.6)                       | 1 (0.7)            | 2 (0.9)              |
| <b>Partial Response</b>                                                    | 3 (4.7)                         | 23 (15.7)                          | 9 (14.3)                      | 17 (11.5)          | 26 (12.3)            |
| <b>Stable Disease</b>                                                      | 25 (39.1)                       | 56 (38.1)                          | 28 (44.4)                     | 53 (35.8)          | 81 (38.4)            |
| <b>Progressive Disease</b>                                                 | 31 (48.4)                       | 62 (42.2)                          | 23 (36.5)                     | 70 (47.3)          | 93 (44.1)            |
| <b>Not evaluable</b>                                                       | 0                               | 1 (0.7)                            | 0                             | 1 (0.7)            | 1 (0.5)              |
| <b>Not Available</b>                                                       | 4 (6.3)                         | 4 (2.7)                            | 2 (3.2)                       | 6 (4.1)            | 8 (3.8)              |
| <b>Disease Control Rate (CR, PR, SD6+)</b>                                 |                                 |                                    |                               |                    |                      |
| n (%)                                                                      | 29 (45.3)                       | 80 (54.4)                          | 38 (60.3)                     | 71 (48.0)          | 109 (51.7)           |
| 95% CI                                                                     | (32.8, 58.3)                    | (46.0, 62.6)                       | (47.2, 72.4)                  | (39.7, 56.3)       | (44.7, 58.6)         |
| <b>Disease Control Rate (CR, PR, SD12+)</b>                                |                                 |                                    |                               |                    |                      |
| n (%)                                                                      | 18 (28.1)                       | 64 (43.5)                          | 27 (42.9)                     | 55 (37.2)          | 82 (38.9)            |
| 95% CI                                                                     | (17.6, 40.8)                    | (35.4, 52.0)                       | (30.5, 56.0)                  | (29.4, 45.5)       | (32.2, 45.8)         |
| <b>Disease Control Rate (CR, PR, SD24+)</b>                                |                                 |                                    |                               |                    |                      |
| n (%)                                                                      | 6 (9.4)                         | 36 (24.5)                          | 17 (27.0)                     | 25 (16.9)          | 42 (19.9)            |
| 95% CI                                                                     | (3.5, 19.3)                     | (17.8, 32.3)                       | (16.6, 39.7)                  | (11.2, 23.9)       | (14.7, 25.9)         |
| <b>Median follow-up, months</b>                                            |                                 |                                    |                               |                    |                      |
| <b>Median</b>                                                              | 6.1                             | 6.2                                | 7.4                           | 6.0                | 6.2                  |
| <b>Min, Max</b>                                                            | 0.7, 34.9                       | 0.6, 34.5                          | 0.7, 34.9                     | 0.6, 34.5          | 0.6, 34.9            |

4 Objective Response Rate, proportion of subjects with best overall response of complete response  
 5 (CR) or partial response (PR). Best overall response is the best response recorded over all on-  
 6 study time-point assessments recorded before start of a new anti-cancer therapy. Disease control  
 7 rate, proportion of subjects with confirmed CR, PR, or stable disease (SD) for 6+, 12+ or 24+  
 8 weeks. Not evaluable: scan done but unevaluable. Not available: no scan or missing assessment.  
 9 CI; confidence interval.
