# Supplementary material for: Botensilimab, an Fc-Enhanced Anti–CTLA-4 Antibody, Is Effective against Tumors Poorly Responsive to Conventional Immunotherapy
Source: PubMed Central journal article supplement — Cancer Discov. 2024 Jul 31;14(12):2407–29. doi: 10.1158/2159-8290.CD-24-0190 (PMC11609826; doi:10.1158/2159-8290.cd-24-0190), 2024-07-31
Supplement: cd-24-0190_supplementary_table_s8_suppst8.pdf [file cd-24-0190_supplementary_table_s8_suppst8.pdf]

- 1 **Supplementary Table S8.** Summary of best overall response of patients treated with
- 2 botensilimab monotherapy or botensilimab in combination with balstilimab.

| Patient ID | Treatment                               | Cancer Type                 | Prior $\alpha$ PD-1(L1) | Prior $\alpha$ CTLA-4 | Best overall response |
|------------|-----------------------------------------|-----------------------------|-------------------------|-----------------------|-----------------------|
| 1          | Botensilimab Monotherapy: 1.0 mg/kg Q3W | MSS Colorectal cancer (CRC) | No                      | No                    | SD                    |
| 2          |                                         |                             | No                      | No                    | PD                    |
| 3          |                                         |                             | Yes                     | No                    | SD                    |
| 4          |                                         |                             | No                      | No                    | PD                    |
| 5          |                                         |                             | No                      | No                    | SD                    |
| 6          |                                         |                             | No                      | No                    | PD                    |
| 7          |                                         |                             | No                      | No                    | PD                    |
| 8          |                                         |                             | Yes                     | No                    | SD                    |
| 9          |                                         |                             | No                      | No                    | PD                    |
| 10         |                                         |                             | No                      | No                    | PD                    |
| 11         |                                         |                             | No                      | No                    | SD                    |
| 12         |                                         |                             | No                      | No                    | SD                    |
| 13         |                                         |                             | No                      | No                    | PD                    |
| 14         |                                         |                             | Yes                     | No                    | PD                    |
| 15         |                                         |                             | Yes                     | No                    | SD                    |
| 16         |                                         |                             | No                      | No                    | SD                    |
| 17         | Botensilimab Monotherapy: 1.0 mg/kg Q6W |                             | No                      | No                    | SD                    |
| 18         | Botensilimab Monotherapy: 2.0 mg/kg Q6W |                             | No                      | No                    | PD                    |

|    |                                                              |                                      |     |    |    |
|----|--------------------------------------------------------------|--------------------------------------|-----|----|----|
| 19 | Botensilimab<br>Monotherapy:<br>0.3 mg/kg Q3W                | MSS<br>Colorectal<br>cancer<br>(CRC) | Yes | No | PD |
| 20 | Botensilimab 1.0 mg/kg<br>Q6W + Balstilimab 3.0<br>mg/kg Q2W |                                      | No  | No | SD |
| 21 |                                                              |                                      | No  | No | SD |
| 22 |                                                              |                                      | Yes | No | SD |
| 23 |                                                              |                                      | No  | No | PD |
| 24 |                                                              |                                      | Yes | No | PD |
| 25 |                                                              |                                      | No  | No | SD |
| 26 |                                                              |                                      | No  | No | SD |
| 27 |                                                              |                                      | No  | No | NA |
| 28 |                                                              |                                      | No  | No | PD |
| 29 |                                                              |                                      | Yes | No | PD |
| 30 |                                                              |                                      | Yes | No | PR |
| 31 |                                                              |                                      | No  | No | SD |
| 32 |                                                              |                                      | No  | No | PR |
| 33 |                                                              |                                      | No  | No | PD |

|    |                                                              |                                      |     |    |    |
|----|--------------------------------------------------------------|--------------------------------------|-----|----|----|
| 34 | Botensilimab 1.0 mg/kg<br>Q6W + Balstilimab 3.0<br>mg/kg Q2W | MSS<br>Colorectal<br>cancer<br>(CRC) | No  | No | SD |
| 35 |                                                              |                                      | Yes | No | PD |
| 36 |                                                              |                                      | No  | No | SD |
| 37 |                                                              |                                      | No  | No | SD |
| 38 |                                                              |                                      | No  | No | SD |
| 39 |                                                              |                                      | No  | No | NA |
| 40 |                                                              |                                      | No  | No | SD |
| 41 |                                                              |                                      | No  | No | SD |
| 42 |                                                              |                                      | No  | No | SD |
| 43 | Botensilimab 150 mg<br>Q6W + Balstilimab 450<br>mg Q3W       |                                      | No  | No | PD |
| 44 | Botensilimab 2.0 mg/kg<br>Q6W + Balstilimab 3.0<br>mg/kg Q2W |                                      | No  | No | PD |
| 45 |                                                              | No                                   | No  | PD |    |
| 46 |                                                              | No                                   | No  | PR |    |
| 47 |                                                              | No                                   | No  | CR |    |

|    |                                                        |                             |     |    |    |
|----|--------------------------------------------------------|-----------------------------|-----|----|----|
| 48 | Botensilimab 2.0 mg/kg Q6W + Balstilimab 3.0 mg/kg Q2W | MSS Colorectal cancer (CRC) | No  | No | SD |
| 49 |                                                        |                             | Yes | No | PD |
| 50 |                                                        |                             | No  | No | PD |
| 51 |                                                        |                             | Yes | No | SD |
| 52 |                                                        |                             | Yes | No | SD |
| 53 |                                                        |                             | No  | No | SD |
| 54 |                                                        |                             | No  | No | PD |
| 55 |                                                        |                             | No  | No | PD |
| 56 |                                                        |                             | No  | No | SD |
| 57 |                                                        |                             | No  | No | PD |
| 58 |                                                        |                             | No  | No | PD |
| 59 |                                                        |                             | No  | No | PD |
| 60 |                                                        |                             | No  | No | PD |
| 61 |                                                        |                             | No  | No | SD |

|    |                                                        |                             |     |    |    |
|----|--------------------------------------------------------|-----------------------------|-----|----|----|
| 62 | Botensilimab 2.0 mg/kg Q6W + Balstilimab 3.0 mg/kg Q2W | MSS Colorectal cancer (CRC) | No  | No | SD |
| 63 |                                                        |                             | No  | No | NE |
| 64 |                                                        |                             | No  | No | SD |
| 65 |                                                        |                             | No  | No | SD |
| 66 |                                                        |                             | No  | No | SD |
| 67 |                                                        |                             | Yes | No | SD |
| 68 |                                                        |                             | No  | No | SD |
| 69 |                                                        |                             | No  | No | PR |
| 70 |                                                        |                             | No  | No | PR |
| 71 |                                                        |                             | Yes | No | SD |
| 72 |                                                        |                             | No  | No | PR |
| 73 |                                                        |                             | No  | No | SD |
| 74 |                                                        |                             | No  | No | PD |
| 75 |                                                        |                             | Yes | No | SD |

|    |                                                        |                             |     |    |    |
|----|--------------------------------------------------------|-----------------------------|-----|----|----|
| 76 | Botensilimab 2.0 mg/kg Q6W + Balstilimab 3.0 mg/kg Q2W | MSS Colorectal cancer (CRC) | Yes | No | PD |
| 77 |                                                        |                             | Yes | No | SD |
| 78 |                                                        |                             | No  | No | PR |
| 79 |                                                        |                             | Yes | No | PD |
| 80 |                                                        |                             | No  | No | PD |
| 81 |                                                        |                             | Yes | No | SD |
| 82 |                                                        |                             | Yes | No | SD |
| 83 |                                                        |                             | No  | No | PD |
| 84 |                                                        |                             | No  | No | PD |
| 85 |                                                        |                             | No  | No | PD |
| 86 |                                                        |                             | No  | No | SD |
| 87 |                                                        |                             | Yes | No | SD |
| 88 |                                                        |                             | No  | No | NA |
| 89 |                                                        |                             | No  | No | PR |

|     |                                                        |                             |     |     |    |
|-----|--------------------------------------------------------|-----------------------------|-----|-----|----|
| 90  | Botensilimab 2.0 mg/kg Q6W + Balstilimab 3.0 mg/kg Q2W | MSS Colorectal cancer (CRC) | No  | No  | SD |
| 91  |                                                        |                             | No  | No  | SD |
| 92  |                                                        |                             | Yes | Yes | SD |
| 93  |                                                        |                             | No  | No  | PD |
| 94  |                                                        |                             | No  | No  | PR |
| 95  |                                                        |                             | No  | No  | PD |
| 96  |                                                        |                             | No  | No  | PD |
| 97  | Botensilimab Monotherapy: 0.1 mg/kg Q3W                | Ovarian Cancer              | Yes | No  | SD |
| 98  | Botensilimab Monotherapy: 0.3 mg/kg Q3W                |                             | Yes | No  | SD |
| 99  | Botensilimab Monotherapy: 1.0 mg/kg Q3W                |                             | Yes | No  | SD |
| 100 | Botensilimab 0.1 mg/kg Q6W + Balstilimab 3.0 mg/kg Q2W |                             | No  | No  | PD |
| 101 |                                                        |                             | No  | No  | SD |
| 102 | Botensilimab 1.0 mg/kg Q6W + Balstilimab 3.0 mg/kg Q2W |                             | No  | No  | SD |
| 103 |                                                        |                             | No  | No  | PD |
| 104 |                                                        | No                          | No  | PR  |    |

|     |                                                        |                |     |    |    |
|-----|--------------------------------------------------------|----------------|-----|----|----|
| 105 | Botensilimab 1.0 mg/kg Q6W + Balstilimab 3.0 mg/kg Q2W | Ovarian Cancer | No  | No | SD |
| 106 |                                                        |                | Yes | No | PR |
| 107 | Botensilimab 150 mg Q6W + Balstilimab 450 mg Q3W       |                | No  | No | NA |
| 108 |                                                        |                | No  | No | SD |
| 109 | Botensilimab 2.0 mg/kg Q6W + Balstilimab 3.0 mg/kg Q2W |                | No  | No | SD |
| 110 |                                                        |                | No  | No | SD |
| 111 |                                                        |                | No  | No | PR |
| 112 |                                                        |                | No  | No | SD |
| 113 |                                                        |                | No  | No | PD |
| 114 |                                                        |                | No  | No | PR |
| 115 |                                                        |                | No  | No | PD |
| 116 |                                                        |                | No  | No | PD |
| 117 |                                                        |                | No  | No | PR |
| 118 |                                                        |                | No  | No | PD |



|     |                                                        |                |     |     |    |
|-----|--------------------------------------------------------|----------------|-----|-----|----|
| 119 | Botensilimab 2.0 mg/kg Q6W + Balstilimab 3.0 mg/kg Q2W | Ovarian Cancer | No  | No  | PD |
| 120 |                                                        |                | No  | No  | PD |
| 121 |                                                        |                | No  | No  | PD |
| 122 |                                                        |                | No  | No  | PD |
| 123 | Botensilimab Monotherapy: 2.0 mg/kg Q3W                | Sarcoma        | No  | No  | PD |
| 124 |                                                        |                | No  | No  | PD |
| 125 | Botensilimab Monotherapy: 3.0 mg/kg Q3W                |                | Yes | Yes | PD |
| 126 | Botensilimab 1.0 mg/kg Q6W + Balstilimab 3.0 mg/kg Q2W |                | No  | No  | PR |
| 127 |                                                        |                | No  | No  | PD |
| 128 |                                                        |                | No  | No  | PD |
| 129 |                                                        |                | No  | No  | SD |
| 130 |                                                        |                | No  | No  | SD |
| 131 |                                                        |                | No  | No  | SD |
| 132 |                                                        |                | No  | No  | PD |
| 133 |                                                        | No             | No  | SD  |    |

|     |                                                        |                   |                                                        |    |    |    |
|-----|--------------------------------------------------------|-------------------|--------------------------------------------------------|----|----|----|
| 134 | Botensilimab 1.0 mg/kg Q6W + Balstilimab 3.0 mg/kg Q2W | Sarcoma           | No                                                     | No | SD |    |
| 135 |                                                        |                   | No                                                     | No | PD |    |
| 136 |                                                        |                   | Botensilimab 2.0 mg/kg Q6W + Balstilimab 3.0 mg/kg Q2W | No | No | PD |
| 137 |                                                        |                   |                                                        | No | No | PD |
| 138 | Botensilimab Monotherapy: 1.0 mg/kg Q3W                | Pancreatic cancer | No                                                     | No | PD |    |
| 139 | Botensilimab Monotherapy: 2.0 mg/kg Q3W                |                   | No                                                     | No | NA |    |
| 140 |                                                        |                   | No                                                     | No | PD |    |
| 141 | Botensilimab Monotherapy: 3.0 mg/kg Q3W                |                   | No                                                     | No | PD |    |
| 142 | Botensilimab 2.0 mg/kg Q6W + Balstilimab 3.0 mg/kg Q2W |                   | No                                                     | No | PD |    |
| 143 |                                                        |                   | No                                                     | No | PD |    |
| 144 |                                                        |                   | No                                                     | No | PD |    |
| 145 |                                                        |                   | No                                                     | No | PD |    |
| 146 |                                                        |                   | Yes                                                    | No | PD |    |
| 147 | Botensilimab 150 mg Q6W + Balstilimab 450 mg Q3W       |                   | No                                                     | No | PD |    |
| 148 | Botensilimab 1.0 mg/kg Q6W + Balstilimab 3.0 mg/kg Q2W | Angiosarcoma      | No                                                     | No | PD |    |

|     |                                                        |              |     |     |    |
|-----|--------------------------------------------------------|--------------|-----|-----|----|
| 149 | Botensilimab 2.0 mg/kg Q6W + Balstilimab 3.0 mg/kg Q2W | Angiosarcoma | No  | No  | PR |
| 150 |                                                        |              | No  | No  | PR |
| 151 |                                                        |              | No  | No  | SD |
| 152 |                                                        |              | No  | No  | PD |
| 153 |                                                        |              | Yes | No  | PD |
| 154 |                                                        |              | No  | No  | PR |
| 155 |                                                        |              | No  | No  | SD |
| 156 |                                                        |              | Yes | No  | SD |
| 157 | Botensilimab Monotherapy: 0.1 mg/kg Q3W                | Melanoma     | Yes | No  | SD |
| 158 | Botensilimab Monotherapy: 2.0 mg/kg Q3W                |              | Yes | No  | NA |
| 159 |                                                        |              | Yes | Yes | PD |
| 160 |                                                        |              | Yes | Yes | PD |
| 161 |                                                        |              | Yes | Yes | SD |
| 162 |                                                        |              | Yes | No  | PR |
| 163 |                                                        |              | Yes | Yes | PR |
| 164 | Botensilimab Monotherapy: 3.0 mg/kg Q3W                |              | Yes | No  | PD |
| 165 | Botensilimab 1.0 mg/kg Q6W + Balstilimab 3.0 mg/kg Q2W | Yes          | Yes | PR  |    |

|     |                                                        |                                    |     |    |    |
|-----|--------------------------------------------------------|------------------------------------|-----|----|----|
| 166 | Botensilimab Monotherapy: 1.0 mg/kg Q6W                | Renal cell carcinoma               | Yes | No | PD |
| 167 | Botensilimab Monotherapy: 1.0 mg/kg Q3W                |                                    | Yes | No | PD |
| 168 | Botensilimab Monotherapy: 2.0 mg/kg Q6W                |                                    | No  | No | SD |
| 169 | Botensilimab Monotherapy: 2.0 mg/kg Q3W                |                                    | No  | No | SD |
| 170 |                                                        |                                    | Yes | No | PD |
| 171 | Botensilimab Monotherapy: 1.0 mg/kg Q3W                | Ampullary of Vater carcinoma       | No  | No | PD |
| 172 |                                                        |                                    | No  | No | SD |
| 173 | Botensilimab Monotherapy: 2.0 mg/kg Q6W                |                                    | No  | No | SD |
| 174 | Botensilimab Monotherapy: 3.0 mg/kg Q3W                |                                    | No  | No | PD |
| 175 | Botensilimab 2.0 mg/kg Q6W + Balstilimab 3.0 mg/kg Q2W | Hepatocellular carcinoma           | Yes | No | PD |
| 176 |                                                        |                                    | Yes | No | SD |
| 177 |                                                        |                                    | Yes | No | SD |
| 178 |                                                        |                                    | Yes | No | PD |
| 179 | Botensilimab Monotherapy: 0.3 mg/kg Q3W                | Non-Small Cell Lung Cancer (NSCLC) | Yes | No | SD |
| 180 | Botensilimab 2.0 mg/kg Q6W + Balstilimab 3.0 mg/kg Q2W |                                    | Yes | No | PR |
| 181 |                                                        |                                    | Yes | No | PR |

|     |                                                        |                                    |     |    |    |
|-----|--------------------------------------------------------|------------------------------------|-----|----|----|
| 182 | Botensilimab 150 mg Q6W + Balstilimab 450 mg Q3W       | Non-Small Cell Lung Cancer (NSCLC) | Yes | No | PR |
| 183 | Botensilimab Monotherapy: 2.0 mg/kg Q3W                | Breast cancer                      | No  | No | PD |
| 184 | Botensilimab 0.3 mg/kg Q6W + Balstilimab 3.0 mg/kg Q2W |                                    | No  | No | PD |
| 185 | Botensilimab 2.0 mg/kg Q6W + Balstilimab 3.0 mg/kg Q2W |                                    | No  | No | PD |
| 186 | Botensilimab Monotherapy: 1.0 mg/kg Q3W                | Endometrial Carcinoma              | Yes | No | CR |
| 187 | Botensilimab 0.1 mg/kg Q6W + Balstilimab 3.0 mg/kg Q2W |                                    | No  | No | PR |
| 188 | Botensilimab 1.0 mg/kg Q6W + Balstilimab 3.0 mg/kg Q2W |                                    | Yes | No | PD |
| 189 | Botensilimab Monotherapy: 0.1 mg/kg Q3W                | Head and Neck cancer               | Yes | No | NA |
| 190 | Botensilimab Monotherapy: 2.0 mg/kg Q3W                |                                    | Yes | No | PD |
| 191 | Botensilimab Monotherapy: 2.0 mg/kg Q6W                |                                    | Yes | No | PD |
| 192 | Botensilimab Monotherapy: 3.0 mg/kg Q3W                | Anal cancer                        | Yes | No | SD |
| 193 | Botensilimab 1.0 mg/kg Q6W + Balstilimab 3.0 mg/kg Q2W |                                    | No  | No | PD |
| 194 | Botensilimab Monotherapy: 2.0 mg/kg Q3W                | Cervical cancer                    | Yes | No | PD |
| 195 | Botensilimab Monotherapy: 3.0 mg/kg Q3W                |                                    | Yes | No | PR |
| 196 | Botensilimab Monotherapy: 0.3 mg/kg Q3W                | Esophageal cancer                  | No  | No | SD |
| 197 | Botensilimab Monotherapy: 2.0 mg/kg Q6W                |                                    | No  | No | PD |

|     |                                                              |                                 |     |    |    |
|-----|--------------------------------------------------------------|---------------------------------|-----|----|----|
| 198 | Botensilimab<br>Monotherapy:<br>1.0 mg/kg Q3W                | Prostate<br>cancer              | No  | No | PD |
| 199 | Botensilimab<br>Monotherapy:<br>2.0 mg/kg Q6W                |                                 | No  | No | SD |
| 200 | Botensilimab<br>Monotherapy:<br>2.0 mg/kg Q3W                | Thyroid<br>carcinoma            | No  | No | PD |
| 201 | Botensilimab 0.3 mg/kg<br>Q6W + Balstilimab 3.0<br>mg/kg Q2W |                                 | No  | No | PD |
| 202 | Botensilimab 1.0 mg/kg<br>Q6W + Balstilimab 3.0<br>mg/kg Q2W | Undetermin<br>ed<br>carcinoma   | No  | No | PD |
| 203 |                                                              |                                 | Yes | No | SD |
| 204 | Botensilimab 1.0 mg/kg<br>Q6W + Balstilimab 3.0<br>mg/kg Q2W | Adrenocorti<br>cal<br>carcinoma | No  | No | SD |
| 205 | Botensilimab<br>Monotherapy:<br>2.0 mg/kg Q3W                | Cholangioc<br>arcinoma          | No  | No | SD |
| 206 | Botensilimab 150 mg<br>Q6W + Balstilimab 450<br>mg Q3W       | Fibrolamella<br>r carcinoma     | Yes | No | SD |
| 207 | Botensilimab<br>Monotherapy:<br>0.3 mg/kg Q3W                | Gallbladder<br>cancer           | No  | No | NA |
| 208 | Botensilimab 2.0 mg/kg<br>Q6W + Balstilimab 3.0<br>mg/kg Q2W | Gastric<br>cancer               | No  | No | PD |
| 209 | Botensilimab<br>Monotherapy:<br>1.0 mg/kg Q6W                | Mesothelio<br>ma                | Yes | No | SD |
| 210 | Botensilimab 2.0 mg/kg<br>Q6W + Balstilimab 3.0<br>mg/kg Q2W | Testicular<br>cancer            | No  | No | PD |
| 211 | Botensilimab<br>Monotherapy:<br>0.1 mg/kg Q3W                | Uveal<br>melanoma               | Yes | No | SD |

3 Subjects with best overall response (BOR) of complete response (CR), partial response (PR) or  
4 stable disease (SD). Best overall response is the best response recorded over all on-study time-  
5 point assessments recorded before start of a new anti-cancer therapy.
