# Supplementary material for: Botensilimab, an Fc-Enhanced Anti–CTLA-4 Antibody, Is Effective against Tumors Poorly Responsive to Conventional Immunotherapy
Source: PubMed Central journal article supplement — Cancer Discov. 2024 Jul 31;14(12):2407–29. doi: 10.1158/2159-8290.CD-24-0190 (PMC11609826; doi:10.1158/2159-8290.cd-24-0190), 2024-07-31
Supplement: cd-24-0190_supplementary_table_s9_suppst9.pdf [file cd-24-0190_supplementary_table_s9_suppst9.pdf]

- 1 **Supplementary Table S9.** Summary of grade 3 or higher treatment-related adverse events
- 2 (TRAEs) of patients with advanced solid tumors treated with botensilimab monotherapy or
- 3 botensilimab in combination with balstilimab.

| Treatment-related adverse events (TRAE), Grade 3 or higher | Botensilimab monotherapy (N=64) | Botensilimab + Balstilimab (N=147) | All Patients (N=211) |
|------------------------------------------------------------|---------------------------------|------------------------------------|----------------------|
|                                                            | Patients n (%)                  |                                    |                      |
| Colitis                                                    | 7 (10.9)                        | 15 (10.2)                          | 22 (10.4)            |
| Diarrhea                                                   | 3 (4.7)                         | 13 (8.8)                           | 16 (7.6)             |
| Fatigue                                                    | 2 (3.1)                         | 4 (2.7)                            | 6 (2.8)              |
| Lymphocyte Count Decreased                                 | 0                               | 4 (2.7)                            | 4 (1.9)              |
| Nausea                                                     | 0                               | 4 (2.7)                            | 4 (1.9)              |
| Alanine Aminotransferase Increased                         | 0                               | 3 (2.0)                            | 3 (1.4)              |
| Aspartate Aminotransferase Increased                       | 0                               | 3 (2.0)                            | 3 (1.4)              |
| Pyrexia                                                    | 0                               | 3 (2.0)                            | 3 (1.4)              |
| Abdominal Pain                                             | 0                               | 2 (1.4)                            | 2 (0.9)              |
| Acute Kidney Injury                                        | 0                               | 2 (1.4)                            | 2 (0.9)              |
| Blood Alkaline Phosphatase Increased                       | 0                               | 2 (1.4)                            | 2 (0.9)              |
| Blood Creatine Phosphokinase Increased                     | 0                               | 2 (1.4)                            | 2 (0.9)              |
| Decreased Appetite                                         | 2 (3.1)                         | 0                                  | 2 (0.9)              |
| Enterocolitis                                              | 1 (1.6)                         | 1 (0.7)                            | 2 (0.9)              |
| Hepatitis                                                  | 0                               | 2 (1.4)                            | 2 (0.9)              |
| Hypotension                                                | 2 (3.1)                         | 0                                  | 2 (0.9)              |
| Rash                                                       | 1 (1.6)                         | 1 (0.7)                            | 2 (0.9)              |
| Vomiting                                                   | 0                               | 2 (1.4)                            | 2 (0.9)              |
| Anemia                                                     | 0                               | 1 (0.7)                            | 1 (0.5)              |
| Arthralgia                                                 | 0                               | 1 (0.7)                            | 1 (0.5)              |

|                                   |         |         |         |
|-----------------------------------|---------|---------|---------|
| Asthenia                          | 1 (1.6) | 0       | 1 (0.5) |
| Atrial Fibrillation               | 0       | 1 (0.7) | 1 (0.5) |
| Back Pain                         | 0       | 1 (0.7) | 1 (0.5) |
| Dehydration                       | 0       | 1 (0.7) | 1 (0.5) |
| Eczema                            | 1 (1.6) | 0       | 1 (0.5) |
| Headache                          | 0       | 1 (0.7) | 1 (0.5) |
| Hypoalbuminemia                   | 1 (1.6) | 0       | 1 (0.5) |
| Hypophosphatasemia                | 0       | 1 (0.7) | 1 (0.5) |
| Hypophysitis                      | 0       | 1 (0.7) | 1 (0.5) |
| Hypovolemic Shock                 | 1 (1.6) | 0       | 1 (0.5) |
| Immune-Mediated Hepatitis         | 0       | 1 (0.7) | 1 (0.5) |
| Lower Gastrointestinal Hemorrhage | 0       | 1 (0.7) | 1 (0.5) |
| Lymphopenia                       | 0       | 1 (0.7) | 1 (0.5) |
| Malabsorption                     | 1 (1.6) | 0       | 1 (0.5) |
| Malaise                           | 0       | 1 (0.7) | 1 (0.5) |
| Myalgia                           | 0       | 1 (0.7) | 1 (0.5) |
| Neutropenia                       | 0       | 1 (0.7) | 1 (0.5) |
| Pneumonitis                       | 0       | 1 (0.7) | 1 (0.5) |
| Polyarthritis                     | 0       | 1 (0.7) | 1 (0.5) |
| Rash Maculo-Papular               | 0       | 1 (0.7) | 1 (0.5) |
| Scleritis                         | 0       | 1 (0.7) | 1 (0.5) |
| Skin Ulcer                        | 1 (1.6) | 0       | 1 (0.5) |
| Stomatitis                        | 1 (1.6) | 0       | 1 (0.5) |
| Tumor Pain                        | 1 (1.6) | 0       | 1 (0.5) |

4 Adverse Events terms were coded using Medical Dictionary for Drug Regulatory Affairs  
5 (MedDRA) version 26.0. Patients with multiple events for a given preferred term were counted  
6 only once.
