# Supplementary material for: Botensilimab, an Fc-Enhanced Anti–CTLA-4 Antibody, Is Effective against Tumors Poorly Responsive to Conventional Immunotherapy
Source: PubMed Central journal article supplement — Cancer Discov. 2024 Jul 31;14(12):2407–29. doi: 10.1158/2159-8290.CD-24-0190 (PMC11609826; doi:10.1158/2159-8290.cd-24-0190), 2024-07-31
Supplement: cd-24-0190_supplementary_table_s10_suppst10.pdf [file cd-24-0190_supplementary_table_s10_suppst10.pdf]

- 1 **Supplementary Table S10.** Key resource table of antibodies and proteins used for flow
- 2 cytometry, multiplex immunohistochemistry and surface plasmon resonance studies.

| <b>Antibodies</b>                            | <b>Source</b>  | <b>Identifier</b>                    |
|----------------------------------------------|----------------|--------------------------------------|
| Anti-human CD11c BUV395 (Clone B-Ly6)        | BD Biosciences | Cat#: 563787<br>RRID: AB_2744274     |
| Anti-human CD40-BUV496 (Clone 5C3)           | BD Biosciences | Cat#: 741159<br>RRID: AB_2870735     |
| Anti-human CD16-BUV563 (Clone 3G8)           | BD Biosciences | Cat#: 748851<br>RRID: AB_2873254     |
| Anti-human HLA-DR BUV661 (Clone G46-6)       | BD Biosciences | Cat#: 612980<br>RRID: AB_2870252     |
| Anti-human CD14 BUV805 (Clone MØP9)          | BD Biosciences | Cat#: 742069<br>RRID: AB_2871355     |
| Anti-human CD86 BV711 (Clone IT2.2)          | BioLegend      | Cat#: 305440<br>RRID: AB_2565835     |
| Anti-human CD56 BV786 (NCAM1) (Clone B159)   | BD Biosciences | Cat#: 555516<br>RRID: AB_395906      |
| Anti-human CD19 FITC (Clone HIB19)           | BioLegend      | Cat#: 302206<br>RRID: AB_314236      |
| Anti-human CD45 Nova Blue 610 (Clone 2D1)    | Thermo Fisher  | Cat#: H005T03B05<br>RRID: AB_2896532 |
| Anti-human CD3 PE/Cy5 (Clone UCHT1)          | BioLegend      | Cat#: 300410<br>RRID: AB_314064      |
| Anti-human CD8 BUV395 (HIT8a)                | BD Biosciences | Cat#: 740303<br>RRID: AB_2740042     |
| Anti-human CD4 BUV496 (Clone SK3)            | BD Biosciences | Cat#: 612936<br>RRID: AB_2870220     |
| Anti-human CD127 BV605 (A019D5)              | BioLegend      | Cat#: 351333<br>RRID: AB_2562019     |
| Anti-Human CD3-BV421 (Clone UCHT1)           | BioLegend      | Cat#: 300434<br>RRID: AB_10962690    |
| Anti-Human CD45-PerCP-Cy5.5 (Clone HI30)     | BioLegend      | Cat#: 304028<br>RRID: AB_893338      |
| Anti-Human FoxP3 FITC (Clone 206D)           | BioLegend      | Cat#: 320106<br>RRID: AB_439752      |
| Anti-Human FoxP3 AF488 (Clone 206D)          | BioLegend      | Cat#: 320112<br>RRID: AB_430883      |
| Anti-human CD25 APC (Clone BC96)             | BioLegend      | Cat#: 302610<br>RRID: AB_314280      |
| L/D NIR                                      | Thermo Fisher  | Cat#: L34975                         |
| Anti-Human CD3 Alexa700 (Clone UCHT1)        | Biolegend      | Cat# 300424<br>RRID: AB_493741       |
| Anti-Human CD4 PerCP-Cy5.5 (Clone RPA-T4)    | Biolegend      | Cat# 300530<br>RRID: AB_893322       |
| Anti-Human CD45RO APC-Fire 750 (Clone UCHL1) | Biolegend      | Cat# 304250<br>RRID: AB_2616717      |

|                                                |                       |                                  |
|------------------------------------------------|-----------------------|----------------------------------|
| Anti-Human CCR7 BV421 (Clone G043H7)           | Biologend             | Cat# 353208<br>RRID: AB_11203894 |
| Anti-Human CXCR3 Alexa647 (Clone G025H7)       | Biologend             | Cat# 353712<br>RRID: AB_10962948 |
| Anti-Human CXCR5 Alexa488 (Clone J252D4)       | Biologend             | Cat# 356912<br>RRID: AB_2561894  |
| Anti-Human HLA-DR BV510 (Clone L243)           | Biologend             | Cat# 307646<br>RRID: AB_2561948  |
| Anti-Human CD8 BUV496 (Clone RPA-T8)           | BD Bioscience         | Cat# 612942<br>RRID: AB_2870223  |
| Anti-Human ICOS BUV395 (Clone DX29)            | BD Bioscience         | Cat# 564777<br>RRID: AB_2738946  |
| Anti human CD127 PE (Clone HIL-7R-M21)         | BD Bioscience         | Cat# 561028<br>RRID: AB_2296056  |
| Anti-human CD32a FITC (Clone IV.3)             | STEMCELL Technologies | Cat# 561028<br>RRID: AB_2296056  |
| Anti-human CD8a BV605 (Clone RPA-T8)           | Biologend             | Cat# 301040<br>RRID: AB_2563185  |
| Anti-human Ki-67 BUV805 (Clone B56)            | BD Bioscience         | Cat# 569635<br>RRID: N/A         |
| Anti-TCR V $\beta$ 22 PE (Clone IMMU 546)      | Beckman Coulter       | Cat# IM2051<br>RRID: AB_131306   |
| Anti-human CD127 BUV395 (Clone HIL-7R-M21)     | BD Bioscience         | Cat# 742547<br>RRID: AB_2740857  |
| Anti-human IL-2 PE/Cyanine7 (Clone MQ1-17H12)  | Biologend             | Cat# 500326<br>RRID: AB_2125594  |
| Anti-human CD3-BV785 (Clone OKT3)              | Biologend             | Cat# 317330<br>RRID: AB_2563507  |
| Anti-human CD45 PerCP/Cyanine 5.5 (Clone HI30) | Biologend             | Cat# 304028<br>RRID: AB_893338   |
| Anti-human CD56 PE-Cy7 (Clone NCAM 16.2)       | BD Bioscience         | Cat# 335791<br>RRID: AB_399970   |
| Anti-human CD19 PE/Cyanine5 (Clone SJ25C1)     | Biologend             | Cat# 363042<br>RRID: AB_2801004  |
| Anti-human CTLA-4 PE-Cy7 (Clone BNI3)          | Biologend             | Cat# 369614<br>RRID: AB_2632875  |
| Anti-mouse CD45 AF700 (Clone 30-F11)           | BD Bioscience         | Cat#565478;<br>RRID:AB_2739257   |
| Anti-mouse CD3 BUV496 (Clone 145-2c11)         | BD Bioscience         | Cat#612955;<br>RRID:AB_2870231   |
| Anti-mouse CD4 PECy5 (Clone GK1.5)             |                       | Cat#612952;<br>RRID:AB_2813886   |
| Anti-mouse CD8 BUV805 (Clone 53-6.7)           | BD Bioscience         | Cat#612898;<br>RRID:AB_2870186   |
| Anti-mouse CD11b PerCPCy5.5 (Clone M1/70)      | Biologend             | Cat#101228;<br>RRID:AB_893233    |
| Anti-mouse CD19 PerCPCy5.5 (Clone 6D5)         | Biologend             | Cat#115534;<br>RRID:AB_2072925   |

|                                                         |                          |                                     |
|---------------------------------------------------------|--------------------------|-------------------------------------|
| Anti-mouse CD25 PE-CF594 (Clone PC61)                   | BD Bioscience            | Cat#562694;<br>RRID:AB_2744346      |
| Anti-mouse CD44 BV605 (Clone IM7)                       | Biologend                | Cat#103047;<br>RRID:AB_2562451      |
| Anti-mouse CD62L BV711 (Clone MEL-14)                   | Biologend                | Cat#104445;<br>RRID:AB_2564215      |
| Anti-mouse CD319 (Slamf7) APC (Clone 4G2)               | Biologend                | Cat#152004;<br>RRID:AB_2632674      |
| Anti-mouse CX3CR1 BV785 (Clone SA011F11)                | Biologend                | Cat#149029;<br>RRID:AB_2565938      |
| Anti-mouse F4/80 PerCPCy5.5 (Clone BM8)                 | Biologend                | Cat#123128;<br>RRID:AB_893496       |
| Anti-mouse FOXP3 FITC (Clone FJK-16s)                   | Thermo Fisher Scientific | Cat#11-5773-82;<br>RRID:AB_465243   |
| Anti-mouse Granzyme PacBlue (Clone GB11)                | Biologend                | Cat#515408;<br>RRID:AB_2562195      |
| Anti-mouse Ly-6G PerCPCy5.5 (Clone 1AB)                 | Biologend                | Cat#127616;<br>RRID:AB_1877271      |
| Anti-mouse PD-1 PECy7 (Clone J43)                       | Thermo Fisher Scientific | Cat#25-9985-82;<br>RRID:AB_10853805 |
| Anti-mouse Vβ8 TCR+ Alexa Fluor 647 (Clone KJ16-133.18) | Biologend                | Cat#118414;<br>RRID:AB_1186096      |
| Anti-human Ki-67 BUV395 (Clone B56)                     | BD Bioscience            | Cat#564071;<br>RRID:AB_2738577      |
| Zombie Near IR                                          | Biologend                | Cat#423106                          |
| Rat IgG2a, κ Alexa Fluor 647 (Clone RTK2758)            | Biologend                | Cat#400526;<br>RRID:AB_2864284      |
| Anti-mouse CD11c BB700 (Clone HL3)                      | BD Biosciences           | Cat#566504; RRID:<br>AB_2869773     |
| Anti-mouse PD-L1 PE (Clone 10F.9G2)                     | BioLegend                | Cat#124308; RRID:<br>AB_2073556     |
| Anti-mouse CD86 PE-Cy7 (Clone GL1)                      | Thermo Fisher            | Cat#25-0862-82; RRID:<br>AB_2573372 |
| Anti-mouse CD80 PE-Cy5 (Clone 1G-10)                    | SouthernBiotech          | Cat#1730-13; RRID:<br>AB_2795209    |
| Live/Dead Near-IR                                       | Thermo Fisher            | Cat#L34976                          |
| Anti-mouse XCR1 APC (Clone ZET)                         | BioLegend                | Cat#148206; RRID:<br>AB_2563932     |
| Anti-mouse NKp46 BV785 (Clone 29A1.4)                   | BioLegend                | Cat#137637; RRID:<br>AB_2734201     |
| Anti-mouse CD3 BV785 (Clone 17A2)                       | BioLegend                | Cat#100232; RRID:<br>AB_2562554     |
| Anti-mouse CD103 BV711 (Clone M290)                     | BD Biosciences           | Cat#564320; RRID:<br>AB_2738743     |
| Anti-mouse CD19 BV650 (Clone 6D5)                       | BioLegend                | Cat#115541; RRID:<br>AB_11204087    |
| Anti-mouse CD172a BV605 (Clone p84)                     | BD Biosciences           | Cat#740390; RRID:<br>AB_2740120     |
| Anti-mouse Ly-6C BV510 (Clone HK1.4)                    | BioLegend                | Cat#128033; RRID:<br>AB_2562351     |

|                                                                               |                                          |                                    |
|-------------------------------------------------------------------------------|------------------------------------------|------------------------------------|
| Anti-mouse CD40 eFluor450 (Clone HM40-3)                                      | Thermo Fisher                            | Cat#48-0402-82; RRID: AB_2574017   |
| Anti-mouse CD8 BUV805 (Clone 53-6.7)                                          | BD Biosciences                           | Cat#612898; RRID: AB_2870186       |
| Anti-mouse F4/80 BUV737 (Clone T45-2342)                                      | BD Biosciences                           | Cat#749283; RRID: AB_2873658       |
| Anti-mouse CD11b BUV661 (Clone M1/70)                                         | BD Biosciences                           | Cat#612977; RRID: AB_2870249       |
| Anti-mouse CD45 BUV563 (Clone 30-F11)                                         | BD Biosciences                           | Cat#612924; RRID: AB_2870209       |
| Anti-mouse IA/IE BUV496 (Clone M5/114.15.2)                                   | BD Biosciences                           | Cat#750281; RRID: AB_2874472       |
| Anti-mouse Ly-6G BUV395 (Clone 1A8)                                           | BD Biosciences                           | Cat#563978; RRID: AB_2716852       |
| <b>Multiplex Immunohistochemistry Antibodies</b>                              |                                          |                                    |
|                                                                               |                                          |                                    |
| Rat anti-mouse CD3-BX021-Cy5-RX021 (Clone 17A2)                               | Akoya Biosciences                        | Cat#4350014; RRID: AB_627010       |
| Rat anti-mouse CD4-BX026-Atto 550-RX026 (Clone RM4-5)                         | Akoya Biosciences                        | Cat#4250016; RRID: AB_627057       |
| Rat anti-mouse CD8 $\alpha$ -BX029-Atto 550-RX029 (Clone 53-6.7)              | Akoya Biosciences                        | Cat#4250017; RRID: AB_627207       |
|                                                                               |                                          |                                    |
| Anti-human CD8 (SP57)                                                         | Ventana                                  | Cat#790-4460; RRID: AB_2335985     |
| Anti-human FoxP3 (SP97)                                                       | Abcam                                    | Cat# Ab99963; RRID: AB_10675258    |
| Anti-human CD68 (KP-1)                                                        | Ventana                                  | Cat#790-2931; RRID: AB_2335972     |
|                                                                               |                                          |                                    |
| <b>Detection Reagents</b>                                                     | <b>Source</b>                            | <b>Identifier</b>                  |
| OmniMap Anti-Ms HRP                                                           | Roche/Ventana                            | Cat# 760-4310                      |
| OmniMap Anti-Rb HRP                                                           | Roche/Ventana                            | Cat# 760-4311                      |
| DISCOVERY Anti-Rb                                                             | Roche/Ventana                            | Cat# 760-4817                      |
| DISCOVERY Anti-NP                                                             | Roche/Ventana                            | Cat# 760-4827                      |
| DISCOVERY Yellow kit                                                          | Roche/Ventana                            | Cat# 760-239                       |
| DISCOVERY Purple kit                                                          | Roche/Ventana                            | Cat# 760-229                       |
| DISCOVERY Teal HRP Kit                                                        | Roche/Ventana                            | Cat# 760-247                       |
| Alexa Fluor® 647 AffiniPure™ F(ab') <sub>2</sub> Fragment Goat Anti-Mouse IgG | Jackson ImmunoResearch Laboratories Inc. | Cat# 115-606-072; RRID: AB_2338928 |
|                                                                               |                                          |                                    |
| <b>PD-L1 staining kit</b>                                                     | <b>Source</b>                            | <b>Identifier</b>                  |
| PD-L1 IHC 28-8 pharmDx                                                        | Dako/Agilent                             | Cat#SK005                          |
|                                                                               |                                          |                                    |
| <b>Proteins</b>                                                               | <b>Source</b>                            | <b>Identifier</b>                  |
| Recombinant human FcGR11A V176F                                               | R&D Systems                              | Cat# 8894-FC                       |
| Recombinant human FcGR11a/CD16a                                               | R&D Systems                              | Cat# 4325-FC                       |
| Recombinant human CTLA-4 Fc                                                   | Acro Biosystems                          | Cat# CT4-H5255                     |

|                                       |                 |                 |
|---------------------------------------|-----------------|-----------------|
| Recombinant human CTLA-4 (his)        | Sino Biological | Cat# 11159-H08H |
| 3 Research Resource Identifier (RRID) |                 |                 |
