# Supplementary material for: Botensilimab, an Fc-Enhanced Anti–CTLA-4 Antibody, Is Effective against Tumors Poorly Responsive to Conventional Immunotherapy
Source: PubMed Central journal article supplement — Cancer Discov. 2024 Jul 31;14(12):2407–29. doi: 10.1158/2159-8290.CD-24-0190 (PMC11609826; doi:10.1158/2159-8290.cd-24-0190), 2024-07-31
Supplement: cd-24-0190_supplementary_table_s11_suppst11.pdf [file cd-24-0190_supplementary_table_s11_suppst11.pdf]

- 1 **Supplementary Table S11.** Light exposure times and the arrangement of cycles for multiplex
- 2 immunofluorescence studies performed using the Akoya Biosciences CODEX platform

| Antibody Target | Clone  | Oligonucleotide | Fluorophore | Working dilution | Exposure time (ms) | Reaction cycle | Reaction channel |
|-----------------|--------|-----------------|-------------|------------------|--------------------|----------------|------------------|
| CD3             | 17A2   | 21              | Cy5         | 1:200            | 500                | 2              | 4                |
| CD4             | RM4-5  | 26              | Atto550     | 1:200            | 400                | 2              | 3                |
| CD8             | 53-6.7 | 29              | Atto550     | 1:200            | 400                | 3              | 3                |

3
